# Supplementary material for: Understanding how to enhance efficacy and effectiveness of feedback via e-portfolio: a realist synthesis protocol
Source: PubMed Central journal article supplement — BMJ Open. 2019 May 9;9(5):e029173. doi: 10.1136/bmjopen-2019-029173 (PMC6528049; doi:10.1136/bmjopen-2019-029173), 2019-05-09
Supplement: bmjopen-2019-029173.draft_revisions.pdf [file bmjopen-2019-029173.draft_revisions.pdf]

# BMJ Open

BMJ Open is committed to open peer review. As part of this commitment we make the peer review history of every article we publish publicly available.

When an article is published we post the peer reviewers' comments and the authors' responses online. We also post the versions of the paper that were used during peer review. These are the versions that the peer review comments apply to.

The versions of the paper that follow are the versions that were submitted during the peer review process. They are not the versions of record or the final published versions. They should not be cited or distributed as the published version of this manuscript.

BMJ Open is an open access journal and the full, final, typeset and author-corrected version of record of the manuscript is available on our site with no access controls, subscription charges or pay-per-view fees (<http://bmjopen.bmj.com>).

If you have any questions on BMJ Open's open peer review process please email [editorial.bmjopen@bmj.com](mailto:editorial.bmjopen@bmj.com)

# BMJ Open

## Understanding how to enhance efficacy and effectiveness of feedback via e-portfolio: A realist synthesis protocol

|                               |                                                                                                                                                                                                                                                                                                                                                                 |
|-------------------------------|-----------------------------------------------------------------------------------------------------------------------------------------------------------------------------------------------------------------------------------------------------------------------------------------------------------------------------------------------------------------|
| Journal:                      | <i>BMJ Open</i>                                                                                                                                                                                                                                                                                                                                                 |
| Manuscript ID                 | bmjopen-2019-029173                                                                                                                                                                                                                                                                                                                                             |
| Article Type:                 | Protocol                                                                                                                                                                                                                                                                                                                                                        |
| Date Submitted by the Author: | 16-Jan-2019                                                                                                                                                                                                                                                                                                                                                     |
| Complete List of Authors:     | Babovic, Mojca; Chang Gung Memorial Hospital Linkou Branch, Chang Gung Medical Education Research Centre (CG-MERC)<br>Fu, Ren-Huei; Chang Gung Memorial Hospital Linkou Branch, Chang Gung Medical Education Research Centre (CG-MERC)<br>Monrouxe, Lynn V; Chang Gung Memorial Hospital Taoyuan Branch, Chang Gung Medical Education Research Centre (CG-MERC) |
| Keywords:                     | Feedback, E-portfolio, Realist Synthesis, Effectiveness, Healthcare Education, Implementation                                                                                                                                                                                                                                                                   |
|                               |                                                                                                                                                                                                                                                                                                                                                                 |

SCHOLARONE™  
Manuscripts

1  
2  
3  
4 Understanding how to enhance efficacy and effectiveness  
5 of feedback via e-portfolio: A realist synthesis protocol  
6  
7

8 Mojca Babovič  
9 Chang Gung Medical Education Research Centre (CG-MERC)  
10 Chang Gung Memorial Hospital  
11 Linkou  
12 Taiwan (R.O.C.)  
13  
14

15 Dr Ren-Huei Fu  
16 Chang Gung Medical Education Research Centre (CG-MERC)  
17 Chang Gung Memorial Hospital  
18 Linkou  
19 Taiwan (R.O.C.)  
20  
21

22 Prof Lynn V Monrouxe  
23 Chang Gung Medical Education Research Centre (CG-MERC)  
24 Chang Gung Memorial Hospital  
25 Linkou  
26 Taiwan (R.O.C.)  
27  
28

29 Contact details for corresponding author:

30 Prof Lynn V Monrouxe  
31 Chang Gung Medical Education Research Centre (CG-MERC)  
32 Chang Gung Memorial Hospital  
33 Education Building  
34 No. 5, Fuxing Street, Guishan District  
35 Taoyuan City  
36 Taiwan (R.O.C.)  
37  
38

39 Telephone: +886975367748  
40 Email: monrouxe@me.com  
41  
42

43 **Word Count:** 3572

44 **Keywords:** Feedback, E-portfolio, Realist Synthesis, Effectiveness, Healthcare  
45 Education, Implementation, Systematic review  
46  
47  
48  
49  
50  
51  
52  
53  
54  
55  
56  
57  
58  
59  
60

## Abstract

### Introduction

The validity of feedback as one of the defining components for electronic portfolios (e-portfolios) to be effective and efficacious has yet to be demonstrated. While the literature has shown individual beneficial features of e-portfolios and feedback *per se*, evidence of feedback as mediated through technology directly resulting in improved educational practice is scarce. The explanation of *how* feedback via e-portfolio improves educational practice is particularly vague.

### Methods and Analysis

The aim of this research is to unpack *how* and *why* feedback via e-portfolio is likely to flourish or wither on its path. Given the complexity of intervention, we will apply a theory driven approach for evidence synthesis called realist synthesis. Informed by realist philosophy of science, it seems the most appropriate method because it explores observed outcomes (O) in terms of causal relationship between relevant contexts (C) and generating mechanisms (M). Initial programme theory will be developed through literature scoping. Later on it will be tested against purposively gathered evidence (through database and journal search), which simultaneously will be evaluated for rigor and relevance (whether method used are trustworthy and whether data contributes to theory building). We strive to (1) uncover “context sensitive” mechanisms that generate feedback via e-portfolio to be (in) effective and (2) define in what circumstances is this mostly likely to occur.

### Ethics and Dissemination

The synthesis’ report will be written according to RAMESES guidelines and its findings will be published in peer reviewed articles and presented at relevant conferences. The aim is to inform: (a) policy and decision makers for future course design; (b) medical educators/clinical supervisors and learners for improved educational use. No formal ethical approval is required.

**Registration details:** The protocol is pending for PROSPERO registration (ID no. 120863).

### Article Summary

#### Strengths and Limitations of this study

- With realist synthesis we account for the breadth and depth of analyses appropriate for complex educational interventions
- No prior realist synthesis has been undertaken on the topic of *how* feedback via e-portfolio works effectively
- In developing our initial programme theory we include stakeholder groups’ input
- Content experts are not included in programme development
- Only studies published in English language will be searched

## BACKGROUND

### Introduction

The interest in electronic portfolio (e-portfolios) use in healthcare education has been on the rise. This is probably because both portfolios in general and electronic versions in particular have shown to be beneficial to the user. In all its complexity of design, content and interface,<sup>1 2</sup> what makes them stand out from other educational tools is their ability to encourage reflective practices and self-directed learning,<sup>3 4</sup> which caters perfectly to educational discourse that emphasizes competence-oriented, individualized learning styles. By emphasizing feelings of ownership and personal development,<sup>5</sup> they encourage learners to become more self-aware of their learning process and more responsible for their own creation, maintenance and presentation.<sup>6</sup>

#### *Contextual use of electronic portfolios in healthcare education*

E-portfolio in healthcare education is foregrounded in its flexibility of access, repository, and content.<sup>2 7-9</sup> When explaining its usage, scholars tend to emphasize its contextualization. For instance, the nature of implementation, design and content<sup>10-13</sup> and the individual perceptions of ease of use and usefulness<sup>14</sup> are all important facets affecting the e-portfolio use and its potential to fundamentally transform the learning process.

Rather than dwelling in the notion of e-portfolio being merely a combination of portfolio and technology,<sup>15</sup> in this paper, we try to argue how organizational, cultural and individual factors present a significant entry point for theorizing the e-portfolio use. More importantly, we do so by focusing specifically on feedback portrayed via e-portfolio. We aim to understand (1) in what circumstances does feedback via e-portfolio work most effectively and (2) whether this relates to fortunes and mishaps of e-portfolio use?

#### *Effectiveness of feedback via e-portfolio*

Feedback plays an influential role on educational achievements,<sup>16</sup> and when employed in healthcare settings it is indispensable for successful learning, clinical teaching and improved clinical performance.<sup>17 18</sup> Surprisingly, in healthcare education, little is known about how feedback can be used to maximize its impact on learning, behavior and improved practice; and much less so when talking about technology-enhanced feedback. One reason for this might be that the majority of research papers on feedback published between 1980 and 2015 used the lowest of Kirkpatrick's levels of evaluation – assessing reactions to feedback – and amongst all the studies, only 7% out of 650 included articles were about computer-based feedback.<sup>19</sup> Literature interpreting feedback as one-way, educator-driven processes, with a focus on best delivery practices only, might be another reason. Indeed, educational studies have shown time and again that the

high variability of effective feedback is too complex for it only to be explained with the notion of delivery processes.<sup>16-20</sup> The many facets of learners' feedback seeking behaviors<sup>21-24</sup> as well as the gaps occurring between mentor's and learner's perceptions of the quantity, quality and efficacy of feedback have to be reconsidered if we are to completely understand feedback practice.

The aim of this research is to develop a model to facilitate feedback via e-portfolio, and thus enhance/ improve the responsiveness and use of feedback. Meaning, we need to understand the contextual workings for giving and receiving feedback in a technology enhanced environment. In addition, we have to consider not only the provision of information, but also the influence of the recipient's decision to receive feedback and all the contended responses which might subsequently arise.

## METHODS

### Aim

Focusing on higher educational settings internationally, we aim to understand why and how feedback via e-portfolio might produce different outcomes. For this purpose, we plan to use a Kirkpatrick hierarchy model modified by Tochel *et al* (2009) and distinguish outcomes that describe the impact of intervention in terms of:

- (a) participants' reactions (e.g., their views on learning experiences, attitudes towards e-portfolio use and usefulness, aspects on the nature and efficiency of feedback );
- (b) changes in participants' attitudes and learning (e.g., changes in perceiving e-portfolio or feedback as useful, acquisition of new concepts, improvement of skills)
- (c) changes in participants' behaviors (motivational changes for further learning, active engagement with agency, e-portfolio content, application of new knowledge);
- (d) changes in organizational practices and any improvements in the health and wellbeing of patients occurring because of the intervention.

### Research questions

(RQ1) What outcomes are identified resulting from feedback via e-portfolio, and at what level do they occur?

(RQ2) What mechanisms are identified that are related to: (1) positive outcomes of feedback via e-portfolio, (2) negative outcomes of feedback via e-portfolio?

(RQ3) What are the contexts within which the mechanisms trigger these outcomes, and for whom?

### Realist synthesis

To address our RQs, within a rapidly developing methodological field of data synthesis,<sup>25</sup> we choose a theory driven approach called realist synthesis.

Underlined by realist philosophy of science, the method's hallmark is in its generative understanding of causality. It holds that outcomes (O) of events are generated by/through underlined mechanisms (M), which may or may not occur in certain context (C).<sup>26</sup> Mechanisms are not "visible" - having their rooting in individual tendencies - and "context specific" - changeable according to the opportunities provided by specific context(s). Realist synthesis thus looks for interactions among the resources provided by the intervention and the reasoning and/or responses of the participants.<sup>27</sup> Rather than assessing variables associated with a particular outcome, the method's strength is in its ability to (1) explore generative mechanisms that underline main causes of (un)intended outcomes and (2) highlight the circumstances in which these mechanisms are triggered.

Realist synthesis starts with a programme theory and ends, if it has been successful, with a "revised, more nuanced and more powerful program theory".<sup>28</sup> (Re)building programme theory means to draw from theoretical descriptions of CMO relationships (middle range theories) that are close enough to the data that allow empirical/hypothetical testing. In our case, by synthesizing the data we will compare how feedback via e-portfolio was intended to work to the empirical data on the actuality in different situations - all with C-M-O relationships. In this manner we might explain some contingencies that influence the prospect of feedback via e-portfolio generating its intended outcomes.

### Study Design

This protocol is pending for PROSPERO registration (ID No. 120863). It follows the iterative steps suggested by Pawson *et al.*,<sup>26</sup> as well as two realist synthesis protocols: one by Wong *et al.*<sup>29</sup> and the other by Pearson *et al.*<sup>30</sup> (See Appendix 1 for *Diagram of the Project*). We plan to report the actual realist synthesis according to RAMESES publication standards<sup>31</sup> and use a modified flow diagram.<sup>29 32</sup>

### STEP 1: Clarify the scope, locate existing theories, develop programme theory

The objective in first step will be to conduct an exploratory (informal search) for various "working theories",<sup>26</sup> helping us to build an initial programme theory. In realist terms - underlining the relationship between the context, mechanisms and outcomes<sup>28 31 33</sup> -we are to explore ideas around how feedback via e-portfolio is intended to work and why sometimes things go astray. When getting a feel for the literature (its quality, quantity, as well as its boundary scope),<sup>26</sup> we will be mindful not to foreclose potentially important perspectives.<sup>30</sup> Therefore, we will conduct a broad electronic database scan for evidence, with no quality assessment in mind.<sup>34</sup> While the body of references will be narrowed down in *Step 2*, the documents in this stage will only need to contain information on e-portfolio related instruments (i.e., e-logbook, personal digital assistants, personal



1  
2  
3 development plans) and feedback /assessment/ evaluation. To further test the  
4 developing theory we will also conduct face-to-face interviews with e-portfolio  
5 users (clinical teachers and postgraduate trainees) as well as engage in  
6 discussion with the research team, who are familiar with the e-portfolio and  
7 feedback literature.  
8  
9

## 10 11 **INITIAL PROGRAMME THEORY**

12 We have started work on this stage and have a number of potential theories that  
13 might help explain the mechanisms underlying the effectiveness of feedback via  
14 e-portfolio (See Appendix 2 *Initial Programme Theory*).  
15

16 Theories of technology adaptation explain how perceptions of e-portfolio  
17 correlate to behavioral changes of e-portfolio usage.<sup>35-37</sup> For example, the  
18 possibility of motivational mechanisms (such as self-efficacy, subjective norms,  
19 level of e-learning enjoyment, experiences and computer anxiety) and their  
20 impact on perception of (O1, O2) and intention to use (O3). These theories can  
21 shed light onto whether the specific technology adopted might in any way affect  
22 the effectiveness and efficacy of feedback portrayed.  
23  
24  
25

26 Another potentially valuable source for our programme theory development  
27 are theories on feedback responsiveness and seeking behaviors.<sup>38-40</sup> Assuming  
28 that response to feedback arise solely from one's sense of self-worth (mediated  
29 as MECHANISMS of fear from criticism, longing for appraisal, expectation of  
30 recognition), individuals are more likely to effortful engage with technology/  
31 agency (O3) when they perceive feedback as being congruent with their selfhood  
32 (regardless of the intervention's context). On the other hand, individuals might  
33 be able to self-regulate their motivation in relation to a specific CONTEXT. As  
34 regulatory focus theory explains,<sup>40 41</sup> it is the "promotion" or "prevention foci" of  
35 the context that will dictate the nature of engagement with technology/agency.  
36 In realist terms, high engagement and behavioral changes (+/-O3) might occur  
37 *only* when positive aspects of the intervention are conducted in promotion  
38 aroused conditions (C), those regulated by wishes and desires; *or* when negative  
39 aspects of the intervention are given in prevention aroused conditions (C), those  
40 regulated by obligation and necessity. For example, in a "promotion foci"  
41 implementation context – such as where e-portfolio is voluntary, a part of  
42 formative assessment, the mentor comments on learner's tasks are positive - the  
43 learner will likely want to engage (M) with the mentor in an effortful manner  
44 (O3), or perhaps vigorously seek (M) new creative ways to continue the work  
45 (O3). By contrast, in a "prevention foci" implementation context – such as where  
46 e-portfolio is mandatory, part of summative evaluation, mentor gives negative  
47 comments – the learner will perhaps become extra hard-working (M) /  
48 hypervigilant just to avoid (M) punishment and rectify (M) the situation. In this  
49 situation, a negative aspect of the intervention (C) might lead to positive  
50 learning, behavioral changes (O3). On the other hand, if the mentor praises  
51 learner's assignments/ performance (C), it is more likely that the feeling will be  
52  
53  
54  
55  
56  
57  
58  
59  
60



1  
2  
3 that no additional effort is needed (M, relaxation, indifference, disengagement),  
4 leading to no behavioral changes and low engagement with self, the mentor or e-  
5 portfolio (O)  
6

7 Finally, the educational alliance theory states that behavioral changes to  
8 feedback happen according to learner's evaluation of mentor's credibility in a  
9 supervisor-trainee relationship.<sup>42 43</sup> This might be another source for potential  
10 theory development. For example, learners trusting in the credibility of the  
11 mentor (clinical competency, content credibility, personal characteristics), and  
12 the relationship (meaningfulness and authenticity), will more likely contemplate  
13 feedback in an effortful manner, which will also probably lead to behavioral  
14 changes (O3).  
15  
16  
17

18 The initial theories uncovered during our searches will be reconsidered  
19 against the empirical data. As such, it is possible that only a small number will be  
20 prioritized for the synthesis, based on their greater resonance with that data.  
21  
22

## 23 **STEP 2: Search for evidence**

24 Utilizing a more formal search for published literature in four bibliographic  
25 databases (Web of Science, Scopus, Medline+Journal@Ovid, Wiley Online  
26 Library), we will look for sufficient evidence to refine, confirm or refute our  
27 initial programme theory (See Appendix 3 *Example Search Strategy for*  
28 *Medline+Journals@Ovid*). Specifically, we will look for: (1) empirical (peer-  
29 reviewed full articles) and non-empirical literature (e.g., review, opinion pieces,  
30 editorials, commentaries, abstracts from conferences, process evaluations,  
31 program manuals) as long as they comply with our rigor and relevance criteria;<sup>31</sup>  
32 <sup>33</sup> (2) studies of all types of research design will be included; (3) articles  
33 published in English; (4) between 2008 and 2017; (5) with participants (learner  
34 and educator role) in healthcare and higher educational settings in Taiwan and  
35 abroad (See Appendix 4 *Definitions of concepts* and Appendix 5 *Inclusion/  
36 Exclusion Criteria for Formal Search*).  
37  
38  
39  
40  
41

42 Because there is no finite set of relevant papers that can be strategically  
43 defined and found, compared to a more traditional systematic review, realist  
44 synthesis adopts an iterative approach to searching for multiple types of  
45 evidence.<sup>26</sup> In order to explore the literature deeper for theoretical elements  
46 which might help to explain new findings, or re-examine certain aspects of  
47 developing theory,<sup>33</sup> we expect to undertake additional inquiries such as: (1)  
48 hand searching relevant journals (related to e-learning, e-portfolio or feedback in  
49 educational setting such as *British Journal of Educational Technology*, *Australian*  
50 *Journal of Educational Technology*, *Electronic Journal of e-learning (EJEL)*,  
51 *International Journal of eportfolios (IJeP)*); (2) using citation tracking (pearling);  
52 (3) skimming through various grey literature platforms  
53 (<https://www.jisc.ac.uk/>); and (4) coming across evidence by chance. Additional  
54 searches will be purposeful, focusing on relevant sources for developing  
55 programme theory. For all searches, we will make augments in our preliminary  
56  
57  
58  
59  
60

1  
2  
3 criteria (e.g., include papers that are missing sufficient data, or not in the  
4 timeframe).  
5

### 7 **STEP 3: Study selection procedure and appraisal**

8 After importing references into *Endnote 9* we will undertake the study selection  
9 in two phases. Firstly, we will screen based on title and abstract, excluding all  
10 references not specifically mentioning web/online portfolios *and* the feedback,  
11 assessment, evaluation portrayed in it. Secondly, we will look at the full text  
12 documents to further exclude based on the following questions: Does this paper  
13 (or section of it) involve feedback via e-portfolio, that (a) is described as an  
14 ongoing (direct or indirect) interaction between receiver and giver using e-  
15 portfolio as educational tool: (b) takes place in higher (healthcare) educational  
16 setting? Using the preliminary set of inclusion/ exclusion rationales, the lead  
17 researcher (LVM) will check a randomly selected sample of 20% of the identified  
18 documents. The remaining will be screened by two reviewers. Any discrepancies  
19 will be discussed until reaching an agreement.  
20  
21

22 Aligned with RAMESSES standards and proposed quality judgments,<sup>31 33</sup> we  
23 will appraise the quality of included content of a section of a text as: (1) relevant,  
24 if they address or contribute to theories we are exploring; and (2) rigor, if the  
25 methods used to generate that particular data are credible and trustworthy.  
26 Quality judgments will be made on “the level of arguments and theory” rather  
27 merely on “the level of data” allowing us to consider evidence seemingly of lesser  
28 quality yet potentially relevant to programme theory development.<sup>34</sup> However,  
29 to give an indication of the “coherence, plausibility and appropriateness”<sup>31</sup> of our  
30 selection, we will (a) apply elemental methodological questions<sup>44</sup> for rigor; and  
31 (b) use a hybrid tool<sup>30 45 46</sup> to distinguish conceptually thick (rich) material from  
32 conceptually thin (weaker) according to its ability to provide explanations to  
33 developing programme theory. This tool has been shown to be useful in theory-  
34 driven synthesis just because it gives the option to focus on richer sources of  
35 programme theory without denying the weaker ones as well<sup>47</sup> (See Appendix 6  
36 *Test for assessing relevance and rigor*).  
37  
38  
39  
40  
41  
42  
43  
44  
45

### 46 **STEP 4: Data Extraction and Organization**

47 For the included full text papers, we will develop a data extraction sheet to  
48 provide an accessible overview of our findings (See Appendix 7 *Data Extraction*  
49 *Table*) as well as importing them into *Atlas.ti*<sup>8</sup> for further coding of the themes.  
50 While coding, we will consider the raw data, textual descriptive findings as well  
51 as authors’ interpretations written in the results or discussion section. For non-  
52 research papers we will consider various forms of textual descriptions. All  
53 relevant sections – relating to context, mechanisms and their relationships to  
54 outcomes – will be coded deductively (conceptual themes/ codes created from  
55 initial programme theory developed prior to data extraction) and inductively  
56 (conceptual themes/ codes recognized during the process). Should the paper  
57  
58  
59  
60

1  
2  
3 contribute to only one specific element of the C-M-O, we will not discard it, as we  
4 will be able to make inferences from other sources.  
5  
6

### 7 **STEP 5: Data synthesis**

8 To refine and further explain the developing programme theory, through the  
9 data synthesis process, we will simultaneously analyze evidence for potential C-  
10 M-Os and organize them in themes and semi predictable patterns.  
11

- 12 • To identify potential C-M-Os we will think “‘backwards’ from the outcome”<sup>48</sup>  
13 and will try to identify the causal mechanisms alongside the contexts within  
14 they are associated. We will be careful not to presume there is only one  
15 outcome within the chain of events;  
16
- 17 • When thematically organizing the data, we will take a similar approach to  
18 that described by many other researches:<sup>28 30 45 46</sup>  
19

20 **Juxtapose sources of evidence**, for instance, when data about the effects of  
21 feedback via e-portfolio in one paper will allow an insight on its effective  
22 patterns in another paper;  
23

24 **Reconcile sources and identify differences**, such as, understanding why  
25 different results might occur in apparently similar situations;  
26

27 **Adjudicate sources of evidence and make judgments between studies** based  
28 on their methodological strengths and weaknesses;  
29

30 **Consolidate sources of evidence**, by creating a multi-faceted explanation of the  
31 intervention. That is, whenever we have different outcomes in particular  
32 contexts, we will try to explain how and why this might occur.  
33

34 **Situate sources of evidence**, for example when a particular mechanism is  
35 triggered in context A, while another mechanism might only occur in context B.  
36  
37

38 During this stage, the programme theory will be redeveloping and in its  
39 refinement. As we delve into our included studies and beyond we will be mindful  
40 of unexpected patterns, which might inform us of new middle range theories,  
41 thereby further explaining dynamics around e-portfolio being an effective means  
42 for the feedback process. Considering we expect to find limited data specific for  
43 our enquiry, we recognize that some of the theoretical assumptions we will make  
44 might be weakly supported. Nevertheless, throughout our work we will be fully  
45 transparent about the levels of evidence available to support/ refute our  
46 hypotheses, giving the reader the space to decide exactly how much of it is  
47 relevant.  
48  
49  
50  
51

### 52 **Patient and Public Involvement Statement**

53 This realist synthesis around feedback via e-portfolio will be done without  
54 patient and public involvement. Our rationale for this is, that, to the best of our  
55 knowledge, patients are not typically involved in this aspect of clinical education  
56 As such, patients will not be invited to contribute to study design, to  
57 interpretation of the results, or help with writing, editing of the document. Also,  
58  
59  
60

we will not include them when developing dissemination strategy.

## ETHICS AND DISSEMINATION

No formal ethical approval is required for this synthesis. We aim to publish our findings in at least one peer review journal as well as present them to relevant bodies including broader educational institutions. At present, we have a fairly vague understanding of the complex dynamics between e-portfolio and feedback, even more unclear are all contingencies closely linked to it. By applying a method that has the analytical strength to provide insight into the complexity,<sup>28</sup> we hope to pinpoint the most valued educational features of effective feedback via e-portfolio in a contextual manner. With a forward-looking perspective, we aim not only to inform the educational community, but also to give practical guidance, recommendations to policymakers on how to reenact the context, or even provide enhanced resources in the future.

**Author Contributions:** LVM conceived the idea for the study, in discussion with MB, designed the study and developed the protocol. MB drafted the protocol manuscript with input from LVM and Kenny Fu. MB prepared the search strategy for *Medline Journals@Ovid* and other supplement data. All authors have read and approved the final manuscript.

**Acknowledgments:** We wish to thank Prof Jan Illing and Prof Amelia Kehoe from Newcastle University for insightful guidance when preparing the manuscript.

**Funding Statement:** This work was supported by the Ministry of Science and Technology, Taiwan No. NMRPD1F1331.

**Competing Interest:** The authors report no competing interests.

**Ethics Approval:** No formal ethical approval is required for this synthesis.

## REFERENCES

1. Driessen EW, van Tartwijk J, van der Vleuten C, et al. Portfolios in medical education: why do they meet with mixed success? A systematic review. *Medical Education* 2007;41:1224-33.
2. Driessen EW, Muijtjens AM, van Tartwijk J, et al. Web- or paper-based portfolios: is there a difference? *Medical Education* 2007a;41:1067-73.
3. Rees C. 'Portfolio' definition: do we need a wider debate? *Medical Education* 2005a;39:1142.
4. Rees C. The use (and abuse) of the term 'portfolio'. *Medical Education* 2005;39:436-37.
5. Klampfer A, Koehler T. E-PORTFOLIOS @ TEACHER TRAINING: AN EVALUATION OF TECHNOLOGICAL AND MOTIVATIONAL FACTORS. IADIS International Conference e-Learning 2013.
6. Lewis KO, Baker RC. The Development of an Electronic Educational Portfolio: An Outline for Medical Education Professionals. *Teaching and Learning in*

- 1  
2  
3  
4  
5  
6  
7  
8  
9  
10  
11  
12  
13  
14  
15  
16  
17  
18  
19  
20  
21  
22  
23  
24  
25  
26  
27  
28  
29  
30  
31  
32  
33  
34  
35  
36  
37  
38  
39  
40  
41  
42  
43  
44  
45  
46  
47  
48  
49  
50  
51  
52  
53  
54  
55  
56  
57  
58  
59  
60
- Medicine* 2007;19(2):139-47
7. Buckley S, Coleman J, Davison I, et al. The educational effects of portfolios on undergraduate student learning: A Best Evidence Medical Education (BEME) systematic review. BEME Guide No.11. *Medical Teacher* 2009;31:282-98.
  8. Chang C-C. A study on the evaluation and effectiveness analysis of web-based learning portfolio (WBLP). *British Journal of Educational Technology* 2001;32(435-458)
  9. Tochel C, Haig A, Hesketh A, et al. The effectiveness of portfolios for post-graduate assessment and education BEME Guide No. 12. *Medical Education* 2009;31(4):299-318.
  10. Duque G. Web-based evaluation of medical clerkships: a new approach to immediacy and efficacy of feedback and assessment. *Medical Teacher* 2003;25(5):510-14.
  11. Duque G, Finkelstein A, Roberts A, et al. Learning while evaluating: the use of an electronic evaluation portfolio in a geriatric medicine clerkship. *BMC Medical Education* 2006;6(4):1-7.
  12. Kjaer NK, Maagaard R, Wied S. Using an online portfolio in postgraduate training. *Medical Teacher* 2006;28(8):707-12.
  13. Strivens J, Baume D, Owen C, et al. The role of e-portfolios in formative and summative assessment practices: Centre for Recording Achievement, 2008.
  14. Dornan T, Carroll C, Parboosingh J. An electronic portfolio for reflective continuing professional development *Medical Education* 2002;36:767-69.
  15. Woodward H, Nanlohy P. Digital portfolios: fact or fashion? *Assessment & Evaluation in Higher Education* 2004;29(4):227-38.
  16. Hattie J, Timperley H. The Power of Feedback. *Review of Educational Research* 2007;77(81):81.
  17. Van de Ridder MJ, Stokking KM, McGaghie WC, et al. What is feedback in clinical education? *Medical Education* 2008;42:189-97.
  18. Veloski J, James R, Boex R, James , Grasberg MJ, et al. Systematic review of the literature on assessment, feedback and physicians' clinical performance: BEME Guide No. 7. *Medical Teacher* 2006;28(2):117-28.
  19. Bing-You R, Hayes V, Varaklis K, et al. Feedback for Learners in Medical Education: What Is Known? A Scoping Review *Academic Medicine* 2017;92(9):1346-54.
  20. Kluger AN, DeNisi A. The Effects of Feedback Interventions on Performance: A Historical Review, a Meta-Analysis, and a Preliminary Feedback Intervention Theory. *Psychological Bulletin* 1996;119(2):254-84.
  21. Archer JC. State of the science in health professional education: effective



- 1  
2  
3 feedback. *Medical Education* 2010;44:101-08.  
4  
5 22. Bing-You R, Hayes V, Varaklis K, et al. Feedback for Learners in Medical  
6 Education: What Is Known? A Scoping Review. *Academic Medicine*  
7 2017;92(9):1346-54.  
8  
9 23. Fu R, Cho Y, Quattri F, et al. 'I did not check if the teacher gave feedback': a  
10 qualitative analysis of Taiwanese postgraduate year 1 trainees' talk around e-  
11 portfolio feedback-seeking behaviours. *BMJ Open* 2019;0(e024425) doi:  
12 10.1136/bmjopen-2018-024425  
13  
14 24. Watling CJ, Lingard L. Toward meaningful evaluation of medical trainees: the  
15 influence of participants' perceptions of the process. *Advances in Health*  
16 *Science Education* 2012;17:183-94.  
17  
18 25. Munn Z, Stern C, Aromataris E, et al. What kind of systematic review should I  
19 conduct? A proposed typology and guidance for systematic reviewers in the  
20 medical and health sciences. *BMC Medical Research Methodology*  
21 2018;18(5):1-9.  
22  
23 26. Pawson R, Greenhalgh T, Harvey G, et al. Realist review – a new method of  
24 systematic review designed for complex policy interventions. *Journal of*  
25 *Health Services Research & Policy* 2005;10(Supplement 1 ):21-34.  
26  
27 27. Wong G, Greenhalgh T, Westhorp G, et al. Realist methods in medical education  
28 research: what are they and what can they contribute? *Medical Education*  
29 2012;46:89-96.  
30  
31 28. Wong G, Westhorp G, Pawson R, et al. Realist Synthesis: Rameses Training  
32 Material. 2013b:1-54.  
33  
34 29. Wong G, Brennan N, Karen M, et al. Interventions to improve antimicrobial  
35 prescribing of doctors in training: the IMPACT (IMProving antimicrobial  
36 presCribing of doctors in Training) realist review. *BMJ Open*  
37 2015a;5(e009059):1-8.  
38  
39 30. Pearson M, Chilton R, Woods HB, et al. Implementing health promotion in  
40 schools: protocol for a realist systematic review of research and experience in  
41 the United Kingdom (UK). *Systematic Reviews* 2012;1(48):1-7.  
42  
43 31. Wong G, Greenhalgh T, Westhorp G, et al. RAMESES publication standards:  
44 realist syntheses *BMC Medicine* 2013a;11(21):1-14.  
45  
46 32. Liberati A, Altman DG, Tetzlaff J, et al. The PRISMA Statement for Reporting  
47 Systematic Reviews and Meta-Analyses of Studies That Evaluate Health Care  
48 Interventions: Explanation and Elaboration. *PLoS Medicine* 2009;6(7):1-28.  
49  
50 33. Wong G, Greenhalgh T, Westhorp G, et al. Development of methodological  
51 guidance, publication standards and training materials for realist and meta-  
52 narrative reviews: the RAMESES (Realist And Meta-narrative Evidence  
53  
54  
55  
56  
57  
58  
59  
60

- Syntheses – Evolving Standards) project. *Health Services and Delivery Research* 2014;2(30):1-251.
34. Wong G. Data Gathering in Realist Review. In: Emmel N, Greenhalgh J, Manzano A, et al., eds. *Doing Realist Research*. Los Angeles, London, New Delhi, Singapore, Washington DC, Melbourne SAGE 2018.
35. Abdullah F, Ward R. Developing a General Extended Technology Acceptance Model for E-Learning (GETAMEL) by analysing commonly used external factors. *Computers in Human Behavior* 2016;56:238-56.
36. Abdullah F, Ward R, Ahmed E. Investigating the influence of the most commonly used external variables of TAM on students' Perceived Ease of Use (PEOU) and Perceived Usefulness (PU) of e-portfolios. *Computers in Human Behavior* 2016a;63:75-90.
37. Carless D. Trust, distrust and their impact on assessment reform *Assessment & Evaluation in Higher Education* 2009;34(1):79-89.
38. Boehler ML, Rogers DA, Schwind CJ, et al. An investigation of medical student reactions to feedback: a randomised controlled trial. *Medical Education* 2006;40:746-49.
39. Eva KW, Armson H, Holmboe E, et al. Factors influencing responsiveness to feedback: on the interplay between fear, confidence, and reasoning processes. *Advances in Health Sciences Education* 2012;17:15-26.
40. Kluger AN, Van Dijk D. Feedback, the various tasks of the doctor, and the feedforward alternative. *Medical Education* 2010;44:1166-74.
41. Watling C, Driessen E, van der Vleuten CP, et al. Understanding responses to feedback: the potential and limitations of regulatory focus theory. *Medical Education* 2012;46:593-603.
42. Telio S, Ajjawi R, Regehr G. The "Educational Alliance" as a Framework for Reconceptualizing Feedback in Medical Education. *Academic Medicine* 2015;90(5):609-14.
43. Telio S, Regehr G, Ajjawi R. Feedback and educational alliance: examining credibility judgements and their consequences *Medical Education* 2016;50:933-42.
44. Ohly H, Crossland N, Dykes F, et al. A realist review to explore how low-income pregnant women use food vouchers from the UK's Healthy Start programme. *BMJ Open* 2017;7(e013731):1-9.
45. Pearson M, Chilton R, Wyatt K, et al. Implementing health promotion programmes in schools: a realist systematic review of research and experience in the United Kingdom. *Implementation Science* 2015;10(149):1-20.



- 1  
2  
3  
4 46. Brennan N, Bryce M, Pearson M, et al. Towards an understanding of how  
5 appraisal of doctors produces its effects: a realist review. *Medical Education*  
6 2017;51:1002-13.  
7  
8 47. Brennan N, Bryce M, Pearson M, et al. Understanding how appraisal of doctors  
9 produces its effects: a realist review protocol. *BMJ Open* 2014;4(e005466  
10 ):1-5.  
11  
12 48. Wong G. Special Invited Editorial: Getting Started With Realist Research.  
13 *International Journal of Qualitative Methods* 2015:1-2.  
14  
15  
16  
17  
18  
19  
20  
21  
22  
23  
24  
25  
26  
27  
28  
29  
30  
31  
32  
33  
34  
35  
36  
37  
38  
39  
40  
41  
42  
43  
44  
45  
46  
47  
48  
49  
50  
51  
52  
53  
54  
55  
56  
57  
58  
59  
60

For peer review only

## Appendix 1 Diagram of the Project

Figure 1. Flow diagram of the Project (Pawson *et al.* 2005; Wong *et al.* 2015a)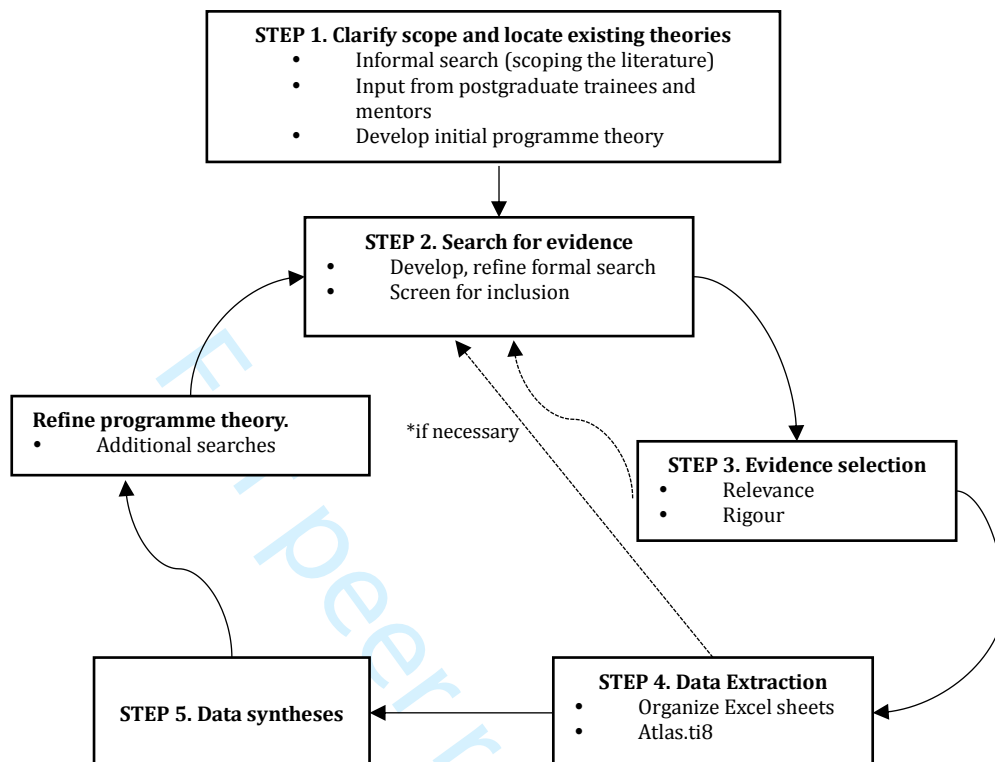

Appendix 2 Initial Programme Theory

Figure 2. Initial Programme Theory

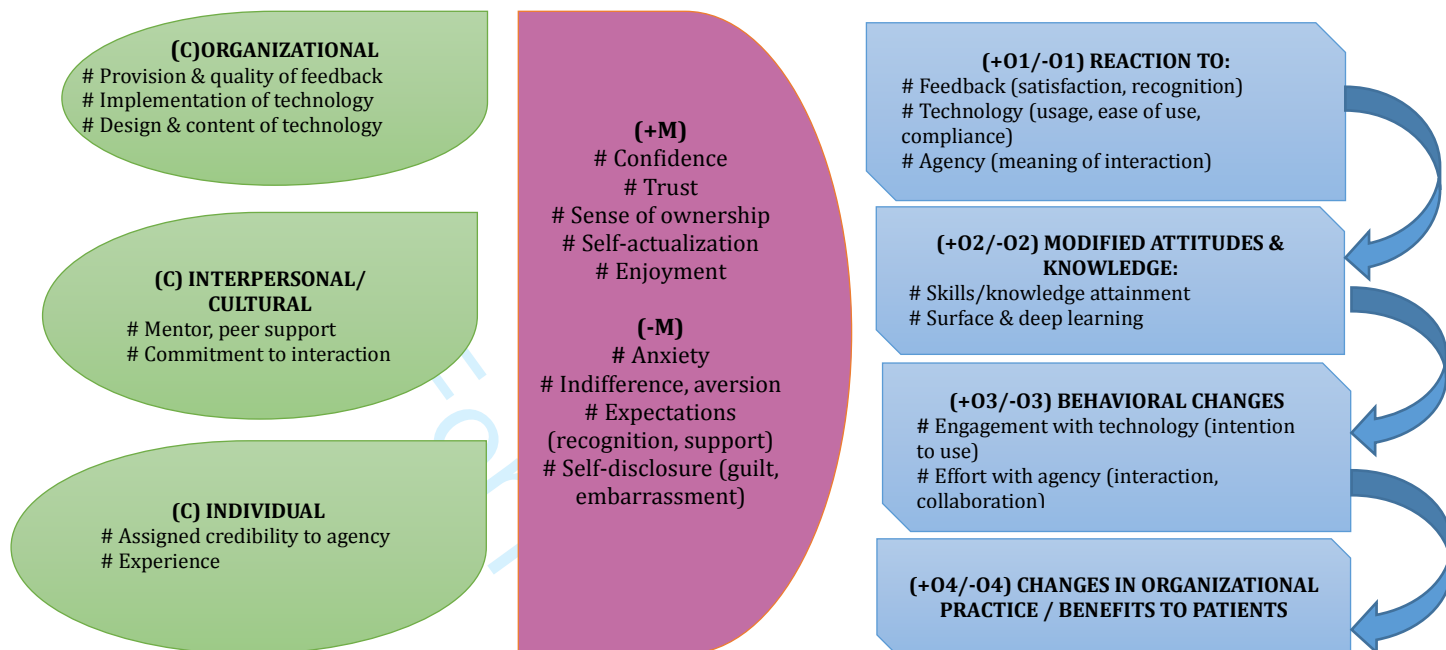

## Appendix 3 Example search strategy for Medline+Journals@Ovid

Table 1. Example search strategy for Medline+Journals@Ovid

|           |                                                                                                       |
|-----------|-------------------------------------------------------------------------------------------------------|
| <b>1</b>  | <b>exp FEEDBACK/</b>                                                                                  |
| <b>2</b>  | ((summative or formative or workplace) adj (feedback or assessment or evaluation)).mp.                |
| <b>3</b>  | ((electronic or online or "web based" or "web-based") adj (feedback or assessment or evaluation)).mp. |
| <b>4</b>  | (portfolio\$ or eportfolio\$ or "e-portfolio\$").mp.                                                  |
| <b>5</b>  | ((paper or "paper based" or "paper-based") adj3 portfolio).mp.                                        |
| <b>6</b>  | ((online or electronic or web or "web based" or "web-based") adj3 portfolio).mp.                      |
| <b>7</b>  | ((online or electronic or web or "web based" or "web-based") adj3 tool).mp.                           |
| <b>8</b>  | OR/1-3                                                                                                |
| <b>9</b>  | OR/4-7                                                                                                |
| <b>10</b> | AND/8,9                                                                                               |
| <b>11</b> | limit 10 to yr="2008 - 2017"                                                                          |
| <b>12</b> | limit 11 to English                                                                                   |

## Appendix 4 Definitions of concepts

Table 2. Definitions of concepts

|                                 | DEFINITION                                                                                                                                               | FORM                                                                                                                  |
|---------------------------------|----------------------------------------------------------------------------------------------------------------------------------------------------------|-----------------------------------------------------------------------------------------------------------------------|
| <b>Feedback</b>                 | Direct or indirect (qualitative, quantitative) interaction between giver and receiver or self.                                                           | Electronic, web-based, online, (e-) feedback, assessment, evaluation.                                                 |
| <b>E-portfolio</b>              | E-portfolio as a tool for managing and documenting one's own learning over a lifespan in ways that encourages deep and continuous learning. <sup>1</sup> | Electronic, digital, web-based, online, e-portfolios                                                                  |
| <b>Feedback via e-portfolio</b> | E-portfolio that fosters a provision of more or less effective feedback                                                                                  | Perceptions of feedback via e-portfolio; Effectiveness of feedback via e-portfolio; Usage of feedback via e-portfolio |

## Appendix 5 Inclusion and exclusion criteria for formal search

Table 3. Inclusion and exclusion criteria for formal search

|                                                 | INCLUSION                                                                                                                | EXCLUSION                                                                                                                                              |
|-------------------------------------------------|--------------------------------------------------------------------------------------------------------------------------|--------------------------------------------------------------------------------------------------------------------------------------------------------|
| <b>Topic</b>                                    | All documents including feedback via e-portfolio as core element.                                                        | Papers focused only on:<br>a. feedback or e-portfolio;<br>b. feedback on implementation or e-portfolio design<br>c. e-portfolio as a tool of research. |
| <b>Study Design</b>                             | All study designs.                                                                                                       | -                                                                                                                                                      |
| <b>Type of Paper</b>                            | Research (peer-reviewed) and non-research pieces (reviews, editorials, communications, conference proceedings, reports). | Documents not applying rigor and relevance criteria <sup>30</sup>                                                                                      |
| <b>Types of Setting</b>                         | Evidence from higher (healthcare) educational setting.                                                                   | Studies done in primary education setting.                                                                                                             |
| <b>Types of participants</b>                    | Receivers AND givers of feedback (i.e., mentor- learner/ learner-learner, learner-self).                                 | -                                                                                                                                                      |
| <b>Language, geographical spread, timeframe</b> | Published worldwide in English.<br>Timespan: 2008-2017                                                                   | -                                                                                                                                                      |

<sup>1</sup> Jenson *et al.* What It Is and Why It Matters. *Change: The Magazine of Higher Learning* 2014;46 (2): 50-57. 2014.

## Appendix 6 Test for assessing relevance and rigour

Table 4. Test for relevance (Pearson *et al.* 2012; 2015; Brennan *et al.* 2017)

| Conceptually Rich                                                                                                                                     | Thicker description' but not 'conceptually rich'                                                                                                    | Conceptually Thin                                                                                                                                                 |
|-------------------------------------------------------------------------------------------------------------------------------------------------------|-----------------------------------------------------------------------------------------------------------------------------------------------------|-------------------------------------------------------------------------------------------------------------------------------------------------------------------|
| Unambiguous theoretical concepts are described in sufficient depth.                                                                                   | Description of programme theory or sufficient information to enable it to 'surface'.                                                                | Insufficient information to enable the programme theory to surface.                                                                                               |
| Relationships between, amongst concepts are clearly articulated.                                                                                      | Consideration of the context in which the programme takes place.                                                                                    | Limited or no consideration of the context in which the programme took place.                                                                                     |
| Concepts are sufficiently developed, defined to enable understanding without the reader needing to have first-hand experience of an area of practice. | Discussion of the differences between the design and orientation of programme theory (what was intended) and implementation (what really happened). | Limited or no discussion of the differences between the design and orientation of programme theory (what was intended) and implementation (what really happened). |
| Concepts are grounded strongly in a cited body of literature.                                                                                         | Recognition and discussion of the strengths/weaknesses of the implemented programme.                                                                | Limited or no discussion of the strengths/ weaknesses of the implemented programme.                                                                               |
| Concepts are parsimonious (i.e., provide the simplest, but not over-simplified, explanation)                                                          | Some attempt to explain anomalous results and findings with reference to context and data.                                                          | No attempts to explain anomalous results and findings with reference to context and data.                                                                         |
|                                                                                                                                                       | Description of the factor affecting implementation.                                                                                                 | Limited or no description of the factors affecting implementation.                                                                                                |
|                                                                                                                                                       | Typified by <b>terms</b> ('model', 'process', or 'function'), <b>verbs</b> ('investigate', 'describes', 'explains'), <b>topics</b> ('experiences'). | Typified by only by mentioning an 'association' between variables.                                                                                                |

Table 5. Test for rigour (Ohly *et al.* 2017)

|                                                                 | Yes | Fairly | No |
|-----------------------------------------------------------------|-----|--------|----|
| The study methods are clearly reported.                         |     |        |    |
| The study methods are appropriate to answer RQ.                 |     |        |    |
| The sample characteristics enable generalizability.             |     |        |    |
| Raw data supports the study findings (conclusions).             |     |        |    |
| Limitations of the study are acknowledged and clearly reported. |     |        |    |





# Reporting checklist for protocol of a systematic review.

Based on the PRISMA-P guidelines.

## Instructions to authors

Complete this checklist by entering the page numbers from your manuscript where readers will find each of the items listed below.

Your article may not currently address all the items on the checklist. Please modify your text to include the missing information. If you are certain that an item does not apply, please write "n/a" and provide a short explanation.

Upload your completed checklist as an extra file when you submit to a journal.

In your methods section, say that you used the PRISMA-P reporting guidelines, and cite them as:

Moher D, Shamseer L, Clarke M, Ghersi D, Liberati A, Petticrew M, Shekelle P, Stewart LA. Preferred Reporting Items for Systematic Review and Meta-Analysis Protocols (PRISMA-P) 2015 statement. *Syst Rev.* 2015;4(1):1.

|                |                     | Reporting Item                                                                                                                                                                                  | Page Number                                           |
|----------------|---------------------|-------------------------------------------------------------------------------------------------------------------------------------------------------------------------------------------------|-------------------------------------------------------|
| Identification | <a href="#">#1a</a> | Identify the report as a protocol of a systematic review                                                                                                                                        | n/a (Realist Synthesis Protocol/RAMESES Standards p5) |
| Update         | <a href="#">#1b</a> | If the protocol is for an update of a previous systematic review, identify as such                                                                                                              | n/a                                                   |
|                | <a href="#">#2</a>  | If registered, provide the name of the registry (such as PROSPERO) and registration number                                                                                                      | n/a (pending for Prospero ID 120863)                  |
| Contact        | <a href="#">#3a</a> | Provide name, institutional affiliation, e-mail address of all protocol authors; provide physical mailing address of corresponding author                                                       | p1                                                    |
| Contribution   | <a href="#">#3b</a> | Describe contributions of protocol authors and identify the guarantor of the review                                                                                                             | p10                                                   |
|                | <a href="#">#4</a>  | If the protocol represents an amendment of a previously completed or published protocol, identify as such and list changes; otherwise, state plan for documenting important protocol amendments | n/a                                                   |
| Sources        | <a href="#">#5a</a> | Indicate sources of financial or other support for the review                                                                                                                                   | p10                                                   |
| Sponsor        | <a href="#">#5b</a> | Provide name for the review funder and / or sponsor                                                                                                                                             | p10                                                   |

|    |                      |                      |                                                                              |                     |
|----|----------------------|----------------------|------------------------------------------------------------------------------|---------------------|
| 1  | Role of sponsor or   | <a href="#">#5c</a>  | Describe roles of funder(s), sponsor(s), and / or institution(s), if any, in | n/a                 |
| 2  | funder               |                      | developing the protocol                                                      |                     |
| 3  |                      |                      |                                                                              |                     |
| 4  | Rationale            | <a href="#">#6</a>   | Describe the rationale for the review in the context of what is already      | p3,4                |
| 5  |                      |                      | known                                                                        |                     |
| 6  |                      |                      |                                                                              |                     |
| 7  |                      |                      |                                                                              |                     |
| 8  | Objectives           | <a href="#">#7</a>   | Provide an explicit statement of the question(s) the review will address     | p4                  |
| 9  |                      |                      | with reference to participants, interventions, comparators, and outcomes     |                     |
| 10 |                      |                      | (PICO)                                                                       |                     |
| 11 |                      |                      |                                                                              |                     |
| 12 |                      |                      |                                                                              |                     |
| 13 |                      |                      |                                                                              |                     |
| 14 | Eligibility criteria | <a href="#">#8</a>   | Specify the study characteristics (such as PICO, study design, setting,      | p7 (Appendix 5)     |
| 15 |                      |                      | time frame) and report characteristics (such as years considered,            |                     |
| 16 |                      |                      | language, publication status) to be used as criteria for eligibility for the |                     |
| 17 |                      |                      | review                                                                       |                     |
| 18 |                      |                      |                                                                              |                     |
| 19 |                      |                      |                                                                              |                     |
| 20 |                      |                      |                                                                              |                     |
| 21 | Information sources  | <a href="#">#9</a>   | Describe all intended information sources (such as electronic databases,     | p7,8                |
| 22 |                      |                      | contact with study authors, trial registers or other grey literature         |                     |
| 23 |                      |                      | sources) with planned dates of coverage                                      |                     |
| 24 |                      |                      |                                                                              |                     |
| 25 |                      |                      |                                                                              |                     |
| 26 | Search strategy      | <a href="#">#10</a>  | Present draft of search strategy to be used for at least one electronic      | p7 (Appendix 3)     |
| 27 |                      |                      | database, including planned limits, such that it could be repeated           |                     |
| 28 |                      |                      |                                                                              |                     |
| 29 |                      |                      |                                                                              |                     |
| 30 | Study records - data | <a href="#">#11a</a> | Describe the mechanism(s) that will be used to manage records and data       | p8,9                |
| 31 | management           |                      | throughout the review                                                        |                     |
| 32 |                      |                      |                                                                              |                     |
| 33 |                      |                      |                                                                              |                     |
| 34 | Study records -      | <a href="#">#11b</a> | State the process that will be used for selecting studies (such as two       | p8                  |
| 35 | selection process    |                      | independent reviewers) through each phase of the review (that is,            |                     |
| 36 |                      |                      | screening, eligibility and inclusion in meta-analysis)                       |                     |
| 37 |                      |                      |                                                                              |                     |
| 38 |                      |                      |                                                                              |                     |
| 39 |                      |                      |                                                                              |                     |
| 40 | Study records - data | <a href="#">#11c</a> | Describe planned method of extracting data from reports (such as             | p8,9                |
| 41 | collection process   |                      | piloting forms, done independently, in duplicate), any processes for         |                     |
| 42 |                      |                      | obtaining and confirming data from investigators                             |                     |
| 43 |                      |                      |                                                                              |                     |
| 44 |                      |                      |                                                                              |                     |
| 45 | Data items           | <a href="#">#12</a>  | List and define all variables for which data will be sought (such as PICO    | p7,8 (Appendix 4,7) |
| 46 |                      |                      | items, funding sources), any pre-planned data assumptions and                |                     |
| 47 |                      |                      | simplifications                                                              |                     |
| 48 |                      |                      |                                                                              |                     |
| 49 |                      |                      |                                                                              |                     |
| 50 |                      |                      |                                                                              |                     |
| 51 | Outcomes and         | <a href="#">#13</a>  | List and define all outcomes for which data will be sought, including        | p4                  |
| 52 | prioritization       |                      | prioritization of main and additional outcomes, with rationale               |                     |
| 53 |                      |                      |                                                                              |                     |
| 54 |                      |                      |                                                                              |                     |
| 55 | Risk of bias in      | <a href="#">#14</a>  | Describe anticipated methods for assessing risk of bias of individual        | p8 (Appendix 6)     |
| 56 | individual studies   |                      | studies, including whether this will be done at the outcome or study         |                     |
| 57 |                      |                      | level, or both; state how this information will be used in data synthesis    |                     |
| 58 |                      |                      |                                                                              |                     |
| 59 |                      |                      |                                                                              |                     |
| 60 |                      |                      |                                                                              |                     |

|    |                |                      |                                                                                                                                                                                                                                                     |     |
|----|----------------|----------------------|-----------------------------------------------------------------------------------------------------------------------------------------------------------------------------------------------------------------------------------------------------|-----|
| 1  | Data synthesis | <a href="#">#15a</a> | Describe criteria under which study data will be quantitatively synthesized                                                                                                                                                                         | n/a |
| 2  |                |                      |                                                                                                                                                                                                                                                     |     |
| 3  |                |                      |                                                                                                                                                                                                                                                     |     |
| 4  |                |                      |                                                                                                                                                                                                                                                     |     |
| 5  |                | <a href="#">#15b</a> | If data are appropriate for quantitative synthesis, describe planned summary measures, methods of handling data and methods of combining data from studies, including any planned exploration of consistency (such as I <sup>2</sup> , Kendall's T) | n/a |
| 6  |                |                      |                                                                                                                                                                                                                                                     |     |
| 7  |                |                      |                                                                                                                                                                                                                                                     |     |
| 8  |                |                      |                                                                                                                                                                                                                                                     |     |
| 9  |                |                      |                                                                                                                                                                                                                                                     |     |
| 10 |                |                      |                                                                                                                                                                                                                                                     |     |
| 11 |                |                      |                                                                                                                                                                                                                                                     |     |
| 12 |                | <a href="#">#15c</a> | Describe any proposed additional analyses (such as sensitivity or subgroup analyses, meta-regression)                                                                                                                                               | n/a |
| 13 |                |                      |                                                                                                                                                                                                                                                     |     |
| 14 |                |                      |                                                                                                                                                                                                                                                     |     |
| 15 |                |                      |                                                                                                                                                                                                                                                     |     |
| 16 |                | <a href="#">#15d</a> | If quantitative synthesis is not appropriate, describe the type of summary planned                                                                                                                                                                  | p9  |
| 17 |                |                      |                                                                                                                                                                                                                                                     |     |
| 18 |                |                      |                                                                                                                                                                                                                                                     |     |
| 19 |                |                      |                                                                                                                                                                                                                                                     |     |
| 20 | Meta-bias(es)  | <a href="#">#16</a>  | Specify any planned assessment of meta-bias(es) (such as publication bias across studies, selective reporting within studies)                                                                                                                       | n/a |
| 21 |                |                      |                                                                                                                                                                                                                                                     |     |
| 22 |                |                      |                                                                                                                                                                                                                                                     |     |
| 23 |                |                      |                                                                                                                                                                                                                                                     |     |
| 24 | Confidence in  | <a href="#">#17</a>  | Describe how the strength of the body of evidence will be assessed (such as GRADE)                                                                                                                                                                  | n/a |
| 25 | cumulative     |                      |                                                                                                                                                                                                                                                     |     |
| 26 | evidence       |                      |                                                                                                                                                                                                                                                     |     |
| 27 |                |                      |                                                                                                                                                                                                                                                     |     |
| 28 |                |                      |                                                                                                                                                                                                                                                     |     |

The PRISMA-P checklist is distributed under the terms of the Creative Commons Attribution License CC-BY 4.0. This checklist can be completed online using <https://www.goodreports.org/>, a tool made by the [EQUATOR Network](#) in collaboration with [Penelope.ai](#)

# BMJ Open

## Understanding how to enhance efficacy and effectiveness of feedback via e-portfolio: A realist synthesis protocol

|                                 |                                                                                                                                                                                                                                                                                                                                                                |
|---------------------------------|----------------------------------------------------------------------------------------------------------------------------------------------------------------------------------------------------------------------------------------------------------------------------------------------------------------------------------------------------------------|
| Journal:                        | <i>BMJ Open</i>                                                                                                                                                                                                                                                                                                                                                |
| Manuscript ID                   | bmjopen-2019-029173.R1                                                                                                                                                                                                                                                                                                                                         |
| Article Type:                   | Protocol                                                                                                                                                                                                                                                                                                                                                       |
| Date Submitted by the Author:   | 02-Apr-2019                                                                                                                                                                                                                                                                                                                                                    |
| Complete List of Authors:       | Babovic, Mojca; Chang Gung Memorial Hospital Linkou Branch, Chang Gung Medical Education Research Centre (CG-MERC)<br>Fu, Ren-Huei; Chang Gung Memorial Hospital Linkou Branch, Chang Gung Medical Education Research Centre (CG-MERC)<br>Monrouxe, Lynn V; Chang Gung Memorial Hospital Linkou Branch, Chang Gung Medical Education Research Centre (CG-MERC) |
| <b>Primary Subject Heading</b>: | Medical education and training                                                                                                                                                                                                                                                                                                                                 |
| Secondary Subject Heading:      | Qualitative research                                                                                                                                                                                                                                                                                                                                           |
| Keywords:                       | Feedback, E-portfolio, Realist Synthesis, Effectiveness, Healthcare Education, Implementation                                                                                                                                                                                                                                                                  |
|                                 |                                                                                                                                                                                                                                                                                                                                                                |

SCHOLARONE™  
Manuscripts

1  
2  
3 Understanding how to enhance efficacy and effectiveness of feedback  
4 via e-portfolio: A realist synthesis protocol  
5  
6  
7

8 Mojca Babovič  
9 Chang Gung Medical Education Research Centre (CG-MERC)  
10 Chang Gung Memorial Hospital  
11 Linkou  
12 Taiwan (R.O.C.)  
13  
14

15 Dr Ren-Huei Fu  
16 Chang Gung Medical Education Research Centre (CG-MERC)  
17 Chang Gung Memorial Hospital  
18 Linkou  
19 Taiwan (R.O.C.)  
20  
21

22 Prof Lynn V Monrouxe  
23 Chang Gung Medical Education Research Centre (CG-MERC)  
24 Chang Gung Memorial Hospital  
25 Linkou  
26 Taiwan (R.O.C.)  
27  
28

29 Contact details for corresponding author:

30 Prof Lynn V Monrouxe  
31 Chang Gung Medical Education Research Centre (CG-MERC)  
32 Chang Gung Memorial Hospital  
33 Education Building  
34 No. 5, Fuxing Street, Guishan District  
35 Taoyuan City  
36 Taiwan (R.O.C.)  
37  
38

39 Telephone: +886975367748  
40 Email: monrouxe@me.com  
41  
42

43 **Word Count: 3,543**

44 **Keywords:** Feedback, E-portfolio, Realist Synthesis, Effectiveness, Healthcare  
45 Education, Implementation, Systematic review  
46  
47  
48  
49  
50  
51  
52  
53  
54  
55  
56  
57  
58  
59  
60

## Abstract

### Introduction

The validity of feedback as one of the defining components for electronic portfolios (e-portfolios) to be effective and efficacious has yet to be demonstrated. While the literature has shown individual beneficial features of e-portfolios and feedback *per se*, evidence of feedback as mediated through technology directly resulting in improved educational practice is scarce. The explanation of *how* feedback via e-portfolio improves educational practice is particularly vague.

### Methods and Analysis

The aim of this research is to unpack *how* and *why* feedback via e-portfolio is likely to flourish or wither on its path. Given the complexity of intervention, we will apply a theory driven approach for evidence synthesis called realist synthesis. Informed by realist philosophy of science, it seems the most appropriate method because it explores observed outcomes (O) in terms of causal relationship between relevant contexts (C) and generating mechanisms (M). Initial programme theory will be developed through literature scoping. Later on it will be tested against purposively gathered evidence (through database and journal search), which simultaneously will be evaluated for rigor and relevance (whether method used are trustworthy and whether data contributes to theory building). We strive to (1) uncover “context sensitive” mechanisms that generate feedback via e-portfolio to be (in) effective and (2) define in what circumstances is this mostly likely to occur.

### Ethics and Dissemination

The synthesis’ report will be written according to RAMESES guidelines and its findings will be published in peer reviewed articles and presented at relevant conferences. The aim is to inform: (a) policy and decision makers for future course design; (b) medical educators/clinical supervisors and learners for improved educational use. No formal ethical approval is required.

**Registration details:** The protocol is pending for PROSPERO registration (ID no. 120863).

### Article Summary

#### Strengths and Limitations of this study

- With realist synthesis we account for the breadth and depth of analyses appropriate for complex educational interventions
- No prior realist synthesis has been undertaken on the topic of *how* feedback via e-portfolio works effectively
- In developing our initial programme theory we include stakeholder groups’ input
- Content experts are not included in programme development
- Only studies published in English language will be searched

## BACKGROUND

### Introduction

Despite variations in content and format, portfolios are essentially a means through which healthcare learners can report on work done, feedback received, progress made and their plans for improving competence.<sup>1</sup> Portfolios in post-graduate healthcare education can be employed for a range of end-purposes including reflective practice and assessment (summative and formative), and act as an essential connection between workplace learning organisationally and individually.<sup>2</sup> As such, the content of a portfolio may vary according to the requirement of an organisation and the design of the training program. For example, the content of medical trainees' e-portfolios may include quantitative assessments (e.g. the Mini-Clinical Evaluation Exercise, Direct Observation of Procedural Skills, Case based Discussion and 360-degree evaluation), reflective writing (e.g. a medical ethics and legislation report, health care quality report, and personal development report), and an evidence-based medicine report. In the context of such a portfolio, clinical teachers are required to provide appropriate feedback for trainees on their assessment and reports contained within.<sup>3</sup> Finally, portfolios can be either physical documents, or can be managed online (known as an e-portfolio).

The interest in e-portfolio use in healthcare education has been on the rise. This is probably because both portfolios in general and electronic versions in particular have shown to be beneficial to the user. In all its complexity of design, content and interface,<sup>1 4</sup> what makes them stand out from other educational tools is their ability to encourage reflective practice and self-directed learning,<sup>5 6</sup> which caters perfectly to the educational discourse that emphasizes competence-oriented, individualized learning styles. By emphasizing feelings of ownership and personal development,<sup>7</sup> they encourage learners to become more self-aware of their learning process and more responsible for their own creation, maintenance and presentation.<sup>8</sup>

#### *Contextual use of electronic portfolios in healthcare education*

E-portfolio in healthcare education is foregrounded in its flexibility of access, repository, and content.<sup>1 2 9 10</sup> When explaining its usage, scholars tend to emphasize its contextualization. For instance, the nature of implementation, design and content<sup>11-14</sup> and the individual perceptions of ease of use and usefulness<sup>15</sup> are all important facets affecting the e-portfolio use and its potential to fundamentally transform the learning process.

Rather than dwelling in the notion of e-portfolio being merely a combination of portfolio and technology,<sup>16</sup> in this paper, we try to argue how organizational, cultural and individual factors present a significant entry point for theorizing the e-portfolio use. More importantly, we do so by focusing specifically on feedback



1  
2  
3 portrayed via e-portfolio. We aim to understand (1) in what circumstances does  
4 feedback via e-portfolio work most effectively and (2) whether this relates to  
5 fortunes and mishaps of e-portfolio use?  
6  
7

### 8 *Effectiveness of feedback via e-portfolio*

9  
10 Feedback plays an influential role on educational achievements,<sup>17</sup> and when  
11 employed in healthcare settings it is indispensable for successful learning,  
12 clinical teaching and improved clinical performance.<sup>18 19</sup> Surprisingly, in  
13 healthcare education, little is known about how feedback can be used to  
14 maximize its impact on learning, behavior and improved practice; and much less  
15 so when talking about technology-enhanced feedback.  
16  
17

18 One reason for this might be that the majority of research papers on  
19 feedback published between 1980 and 2015 used the lowest of Kirkpatrick's  
20 levels of evaluation – assessing reactions to feedback – and amongst all the  
21 studies, only 7% out of 650 included articles were about computer-based  
22 feedback.<sup>20</sup> Literature interpreting feedback as one-way, educator-driven  
23 processes, with a focus on best delivery practices only, might be another reason.  
24 Indeed, educational studies have shown time and again that the high variability  
25 of effective feedback is too complex for it only to be explained with the notion of  
26 delivery processes.<sup>17 21</sup> The many facets of learners' feedback seeking behaviors<sup>3</sup>  
27 <sup>22-24</sup> as well as the gaps occurring between mentor's and learner's perceptions of  
28 the quantity, quality and efficacy of feedback have to be reconsidered if we are to  
29 completely understand feedback practice. Indeed, feedback via e-portfolios can  
30 occur variously, including: as asynchronous written feedback in which the  
31 educator leaves their comments for the learner to find and read, as synchronous  
32 technology-enhanced feedback, as synchronous face-to-face feedback, as  
33 mandatory or voluntary and as open access or not.  
34  
35  
36  
37  
38  
39

40 The aim of this research is to develop a model to facilitate feedback via e-  
41 portfolio, and thus enhance/ improve the responsiveness and use of feedback.  
42 Meaning, we need to understand the contextual workings for giving and  
43 receiving feedback in a technology enhanced environment. In addition, we have  
44 to consider not only the provision of information, but also the influence of the  
45 manner in which feedback is provided, the recipient's decision to receive  
46 feedback and all the contended responses which might subsequently arise.  
47  
48  
49  
50

## 51 **METHODS**

### 52 **Aim**

53 Focusing on higher educational settings internationally, we aim to understand  
54 why and how feedback via e-portfolio might produce different outcomes. For this  
55 purpose, we plan to use a Kirkpatrick hierarchy model modified by Tochel *et al*  
56 (2009) and distinguish outcomes that describe the impact of intervention in  
57 terms of:  
58  
59  
60

- 1  
2  
3 (a) participants' reactions (e.g., their views on learning experiences, attitudes  
4 towards e-portfolio use and usefulness, aspects on the nature and efficiency  
5 of feedback );  
6  
7 (b) changes in participants' attitudes and learning (e.g., changes in perceiving e-  
8 portfolio or feedback as useful, acquisition of new concepts, improvement of  
9 skills)  
10  
11 (c) changes in participants' behaviors (motivational changes for further learning,  
12 active engagement with agency, e-portfolio content, application of new  
13 knowledge);  
14  
15 (d) changes in organizational practices and any improvements in the health and  
16 wellbeing of patients occurring because of the intervention.  
17  
18

### 19 **Research questions**

20 (RQ1) What outcomes are identified resulting from feedback via e-portfolio, and  
21 at what level do they occur?  
22

23 (RQ2) What mechanisms are identified that are related to: (1) positive outcomes  
24 of feedback via e-portfolio, (2) negative outcomes of feedback via e-portfolio?  
25

26 (RQ3) What are the contexts within which the mechanisms trigger these  
27 outcomes, and for whom?  
28  
29

### 30 **Realist synthesis**

31 To address our RQs, within a rapidly developing methodological field of data  
32 synthesis,<sup>25</sup> we choose a theory driven approach called realist synthesis.  
33 Underlined by realist philosophy of science, the method's hallmark is in its  
34 generative understanding of causality. It holds that outcomes (O) of events are  
35 generated by/through underlined mechanisms (M), which may or may not occur  
36 in certain context (C).<sup>26</sup> Mechanisms are not "visible"- having their rooting in  
37 individual tendencies - and "context specific" - changeable according to the  
38 opportunities provided by specific context(s). Realist synthesis thus looks for  
39 interactions among the resources provided by the intervention and the  
40 reasoning and/or responses of the participants.<sup>27</sup> Rather than assessing  
41 variables associated with a particular outcome, the method's strength is in its  
42 ability to (1) explore generative mechanisms that underline main causes of  
43 (un)intended outcomes and (2) highlight the circumstances in which these  
44 mechanisms are triggered.  
45  
46  
47  
48  
49

50 Realist synthesis starts with a programme theory and ends, if it has been  
51 successful, with a "revised, more nuanced and more powerful program theory".<sup>28</sup>  
52 (Re)building programme theory means to draw from theoretical descriptions of  
53 CMO relationships (middle range theories) that are close enough to the data that  
54 allow empirical/hypothetical testing. In our case, by synthesizing the data we  
55 will compare how feedback via e-portfolio was intended to work to the empirical  
56 data on the actuality in different situations - all with C-M-O relationships. In this  
57 manner we might explain some contingencies that influence the prospect of  
58  
59  
60

1  
2  
3 feedback via e-portfolio generating its intended outcomes.  
4  
5

### 6 **Study Design**

7 This protocol registered at PROSPERO (ID No. 120863). It follows the iterative  
8 steps suggested by Pawson *et al.*,<sup>26</sup> as well as two realist synthesis protocols: one  
9 by Wong *et al.*<sup>29</sup> and the other by Pearson *et al.*<sup>30</sup> (See Appendix 1 for *Diagram of*  
10 *the Project*). We plan to report the actual realist synthesis according to RAMESES  
11 publication standards<sup>31</sup> and use a modified flow diagram.<sup>29 32</sup>  
12  
13

### 14 **STEP 1: Clarify the scope, locate existing theories, develop programme** 15 **theory**

16 The objective in first step will be to conduct an exploratory (informal search) for  
17 various “working theories”,<sup>26</sup> helping us to build an initial programme theory. In  
18 realist terms – underlining the relationship between the context, mechanisms  
19 and outcomes<sup>28 31 33</sup> –we are to explore ideas around how feedback via e-  
20 portfolio is intended to work and why sometimes things go astray. When getting  
21 a feel for the literature (its quality, quantity, as well as its boundary scope),<sup>26</sup> we  
22 will be mindful not to foreclose potentially important perspectives.<sup>30</sup> Therefore,  
23 we will conduct a broad electronic database scan for evidence, with no quality  
24 assessment in mind.<sup>34</sup> While the body of references will be narrowed down in  
25 *Step 2*, the documents in this stage will only need to contain information on e-  
26 portfolio related instruments (i.e., e-logbook, personal digital assistants, personal  
27 development plans) and feedback /assessment/ evaluation. To further test the  
28 developing theory we will also conduct face-to-face interviews with e-portfolio  
29 users (clinical teachers and postgraduate trainees) as well as engage in  
30 discussion with the research team, who are familiar with the e-portfolio and  
31 feedback literature.  
32  
33  
34  
35  
36  
37  
38  
39

### 40 **INITIAL PROGRAMME THEORY**

41 We have started work on this stage and have a number of potential theories that  
42 might help explain the mechanisms underlying the effectiveness of feedback via  
43 e-portfolio (See Appendix 2 *Initial Programme Theory*).  
44

45 Theories of technology adaptation explain how perceptions of e-portfolio  
46 correlate to behavioral changes of e-portfolio usage.<sup>35-37</sup> For example, the  
47 possibility of motivational mechanisms (such as self-efficacy, subjective norms,  
48 level of e-learning enjoyment, experiences and computer anxiety) and their  
49 impact on perception of (O1, O2) and intention to use (O3). These theories can  
50 shed light onto whether the specific technology adopted might in any way affect  
51 the effectiveness and efficacy of feedback portrayed.  
52

53 Another potentially valuable source for our programme theory development  
54 are theories on feedback responsiveness and seeking behaviors.<sup>38-40</sup> Assuming  
55 that response to feedback arise solely from one’s sense of self-worth (mediated  
56 as MECHANISMS of fear from criticism, longing for appraisal, expectation of  
57  
58  
59  
60

1  
2  
3 recognition), individuals are more likely to effortful engage with technology/  
4 agency (O3) when they perceive feedback as being congruent with their selfhood  
5 (regardless of the intervention's context). On the other hand, individuals might  
6 be able to self-regulate their motivation in relation to a specific CONTEXT. As  
7 regulatory focus theory explains,<sup>40 41</sup> it is the "promotion" or "prevention foci" of  
8 the context that will dictate the nature of engagement with technology/agency.  
9 In realist terms, high engagement and behavioral changes (+/-O3) might occur  
10 *only* when positive aspects of the intervention are conducted in promotion  
11 aroused conditions (C), those regulated by wishes and desires; *or* when negative  
12 aspects of the intervention are given in prevention aroused conditions (C), those  
13 regulated by obligation and necessity. For example, in a "promotion foci"  
14 implementation context – such as where e-portfolio is voluntary, a part of  
15 formative assessment, the mentor comments on learner's tasks are positive - the  
16 learner will likely want to engage (M) with the mentor in an effortful manner  
17 (O3), or perhaps vigorously seek (M) new creative ways to continue the work  
18 (O3). By contrast, in a "prevention foci" implementation context – such as where  
19 e-portfolio is mandatory, part of summative evaluation, mentor gives negative  
20 comments – the learner will perhaps become extra hard-working (M) /  
21 hypervigilant just to avoid (M) punishment and rectify (M) the situation. In this  
22 situation, a negative aspect of the intervention (C) might lead to positive  
23 learning, behavioral changes (O3). On the other hand, if the mentor praises  
24 learner's assignments/ performance (C), it is more likely that the feeling will be  
25 that no additional effort is needed (M, relaxation, indifference, disengagement),  
26 leading to no behavioral changes and low engagement with self, the mentor or e-  
27 portfolio (O)

28  
29 Finally, the educational alliance theory states that behavioral changes to  
30 feedback happen according to learner's evaluation of mentor's credibility in a  
31 supervisor-trainee relationship.<sup>42 43</sup> This might be another source for potential  
32 theory development. For example, learners trusting in the credibility of the  
33 mentor (clinical competency, content credibility, personal characteristics), and  
34 the relationship (meaningfulness and authenticity), will more likely contemplate  
35 feedback in an effortful manner, which will also probably lead to behavioral  
36 changes (O3).

37  
38 The initial theories uncovered during our searches will be reconsidered  
39 against the empirical data. As such, it is possible that only a small number will be  
40 prioritized for the synthesis, based on their greater resonance with that data.

## 51 52 **STEP 2: Search for evidence**

53 Utilizing a more formal search for published literature in four bibliographic  
54 databases (Web of Science, Scopus, Medline+Journal@Ovid, Wiley Online  
55 Library), we will look for sufficient evidence to refine, confirm or refute our  
56 initial programme theory (See Appendix 3 *Example Search Strategy for*  
57 *Medline+Journals@Ovid*). Specifically, we will look for: (1) empirical (peer-  
58  
59  
60

1  
2  
3 reviewed full articles) and non-empirical literature (e.g., review, opinion pieces,  
4 editorials, commentaries, abstracts from conferences, process evaluations,  
5 program manuals) as long as they comply with our rigor and relevance criteria;<sup>31</sup>  
6<sup>33</sup> (2) studies of all types of research design will be included; (3) articles  
7 published in English; (4) between 2008 and 2017; (5) with participants (learner  
8 and educator role) in healthcare and higher educational settings in Taiwan and  
9 abroad (See Appendix 4 *Definitions of concepts* and Appendix 5 *Inclusion/  
10 Exclusion Criteria for Formal Search*).

11  
12  
13  
14 Because there is no finite set of relevant papers that can be strategically  
15 defined and found, compared to a more traditional systematic review, realist  
16 synthesis adopts an iterative approach to searching for multiple types of  
17 evidence.<sup>26</sup> In order to explore the literature deeper for theoretical elements  
18 which might help to explain new findings, or re-examine certain aspects of  
19 developing theory,<sup>33</sup> we expect to undertake additional inquiries such as: (1)  
20 hand searching relevant journals (related to e-learning, e-portfolio or feedback in  
21 educational setting such as *British Journal of Educational Technology*, *Australian  
22 Journal of Educational Technology*, *Electronic Journal of e-learning (EJEL)*,  
23 *International Journal of eportfolios (IJeP)*; (2) using citation tracking (pearling);  
24 (3) skimming through various grey literature platforms  
25 (<https://www.jisc.ac.uk/>); and (4) coming across evidence by chance. Additional  
26 searches will be purposeful, focusing on relevant sources for developing  
27 programme theory. For all searches, we will make augments in our preliminary  
28 criteria (e.g., include papers that are missing sufficient data, or not in the  
29 timeframe).

### 36 37 **STEP 3: Study selection procedure and appraisal**

38 After importing references into *Endnote 9* we will undertake the study selection  
39 in two phases. Firstly, we will screen based on title and abstract, excluding all  
40 references not specifically mentioning web/online portfolios *and* the feedback,  
41 assessment, evaluation portrayed in it. Secondly, we will look at the full text  
42 documents to further exclude based on the following questions: Does this paper  
43 (or section of it) involve feedback via e-portfolio, that (a) is described as an  
44 ongoing (direct or indirect) interaction between receiver and giver using e-  
45 portfolio as educational tool: (b) takes place in higher (healthcare) educational  
46 setting? Using the preliminary set of inclusion/ exclusion rationales, the lead  
47 researcher (LVM) will check a randomly selected sample of 20% of the identified  
48 documents. The remaining will be screened by two reviewers. Any discrepancies  
49 will be discussed until reaching an agreement.

50 Aligned with RAMESES standards and proposed quality judgments,<sup>31 33</sup> we  
51 will appraise the quality of included content of a section of a text as: (1) relevant,  
52 if they address or contribute to theories we are exploring; and (2) rigor, if the  
53 methods used to generate that particular data are credible and trustworthy.  
54 Quality judgments will be made on “the level of arguments and theory” rather  
55  
56  
57  
58  
59  
60



merely on “the level of data” allowing us to consider evidence seemingly of lesser quality yet potentially relevant to programme theory development.<sup>34</sup> However, to give an indication of the “coherence, plausibility and appropriateness”<sup>31</sup> of our selection, we will (a) apply elemental methodological questions<sup>44</sup> for rigor; and (b) use a hybrid tool<sup>30 45 46</sup> to distinguish conceptually thick (rich) material from conceptually thin (weaker) according to its ability to provide explanations to developing programme theory. This tool has been shown to be useful in theory-driven synthesis just because it gives the option to focus on richer sources of programme theory without denying the weaker ones as well<sup>47</sup> (See Appendix 6 *Test for assessing relevance and rigor*).

#### **STEP 4: Data Extraction and Organization**

For the included full text papers, we will develop a data extraction sheet to provide an accessible overview of our findings (See Appendix 7 *Data Extraction Table*) as well as importing them into *Atlas.ti* 8 for further coding of the themes. While coding, we will consider the raw data, textual descriptive findings as well as authors’ interpretations written in the results or discussion section. For non-research papers we will consider various forms of textual descriptions. All relevant sections – relating to context, mechanisms and their relationships to outcomes – will be coded deductively (conceptual themes/ codes created from initial programme theory developed prior to data extraction) and inductively (conceptual themes/ codes recognized during the process). Should the paper contribute to only one specific element of the C-M-O, we will not discard it, as we will be able to make inferences from other sources.

#### **STEP 5: Data synthesis**

To refine and further explain the developing programme theory, through the data synthesis process, we will simultaneously analyze evidence for potential C-M-Os and organize them in themes and semi predictable patterns.

- To identify potential C-M-Os we will think “backwards’ from the outcome”<sup>48</sup> and will try to identify the causal mechanisms alongside the contexts within they are associated. We will be careful not to presume there is only one outcome within the chain of events;
- When thematically organizing the data, we will take a similar approach to that described by many other researches:<sup>28 30 45 46</sup>

**Juxtapose sources of evidence**, for instance, when data about the effects of feedback via e-portfolio in one paper will allow an insight on its effective patterns in another paper;

**Reconcile sources and identify differences**, such as, understanding why different results might occur in apparently similar situations;

**Adjudicate sources of evidence and make judgments between studies** based on their methodological strengths and weaknesses;

**Consolidate sources of evidence**, by creating a multi-faceted explanation of the

1  
2  
3 intervention. That is, whenever we have different outcomes in particular  
4 contexts, we will try to explain how and why this might occur.

5 **Situate sources of evidence**, for example when a particular mechanism is  
6 triggered in context A, while another mechanism might only occur in context B.  
7  
8  
9

10 During this stage, the programme theory will be redeveloping and in its  
11 refinement. As we delve into our included studies and beyond we will be mindful  
12 of unexpected patterns, which might inform us of new middle range theories,  
13 thereby further explaining dynamics around e-portfolio being an effective means  
14 for the feedback process. Considering we expect to find limited data specific for  
15 our enquiry, we recognize that some of the theoretical assumptions we will make  
16 might be weakly supported. Nevertheless, throughout our work we will be fully  
17 transparent about the levels of evidence available to support/ refute our  
18 hypotheses, giving the reader the space to decide exactly how much of it is  
19 relevant.  
20  
21  
22  
23

#### 24 **Patient and Public Involvement Statement**

25 This realist synthesis around feedback via e-portfolio will be done without  
26 patient and public involvement. Our rationale for this is that, to the best of our  
27 knowledge, patients are not typically involved in this aspect of clinical education.  
28 As such, patients will not be invited to contribute to study design, interpretation  
29 of the results, or help with writing, editing of the document. Also, we will not  
30 include them when developing dissemination strategy.  
31  
32  
33  
34  
35

#### 36 **ETHICS AND DISSEMINATION**

37 No formal ethical approval is required for this synthesis. We aim to publish our  
38 findings in at least one peer review journal as well as present them to relevant  
39 bodies including broader educational institutions. At present, we have a fairly  
40 vague understanding of the complex dynamics between e-portfolio and feedback,  
41 even more unclear are all contingencies closely linked to it. By applying a method  
42 that has the analytical strength to provide insight into the complexity,<sup>28</sup> we hope  
43 to pinpoint the most valued educational features of effective feedback via e-  
44 portfolio in a contextual manner. With a forward-looking perspective, we aim not  
45 only to inform the educational community, but also to give practical guidance,  
46 recommendations to policymakers on how to reenact the context, or even  
47 provide enhanced resources in the future.  
48  
49  
50  
51  
52  
53

54 **Contributorship Statement:** LVM and KHF conceived the idea for the study, in discussion with MB,  
55 designed the study and developed the protocol. MB drafted the protocol manuscript with input from LVM  
56 and KF. MB prepared the search strategy for Medline Journals@Ovid and other supplement data. All authors  
57 have read and approved the final manuscript.

58 **Acknowledgments:** We wish to thank Prof Jan Illing and Prof Amelia Kehoe from Newcastle University for  
59 insightful guidance when preparing the manuscript.  
60

**Funding Statement:** This work was supported by the Ministry of Science and Technology, Taiwan No. NMRPD1F1331.

**Competing Interest:** The authors report no competing interests.

**Ethics Approval:** No formal ethical approval is required for this synthesis.

## REFERENCES

1. Driessen EW, Muijtjens AM, van Tartwijk J, et al. Web- or paper-based portfolios: is there a difference? *Medical Education* 2007a;41:1067-73.
2. Tochel C, Haig A, Hesketh A, et al. The effectiveness of portfolios for post-graduate assessment and education BEME Guide No. 12. *Medical Education* 2009;31(4):299-318.
3. Fu R, Cho Y, Quattri F, et al. 'I did not check if the teacher gave feedback': a qualitative analysis of Taiwanese postgraduate year 1 trainees' talk around e-portfolio feedback-seeking behaviours. *BMJ Open* 2019;0(e024425) doi: 10.1136/bmjopen-2018-024425
4. Driessen EW, van Tartwijk J, van der Vleuten C, et al. Portfolios in medical education: why do they meet with mixed success? A systematic review. *Medical Education* 2007;41:1224-33.
5. Rees C. 'Portfolio' definition: do we need a wider debate? *Medical Education* 2005a;39:1142.
6. Rees C. The use (and abuse) of the term 'portfolio'. *Medical Education* 2005;39:436-37.
7. Klampfer A, Koehler T. E-PORTFOLIOS @ TEACHER TRAINING: AN EVALUATION OF TECHNOLOGICAL AND MOTIVATIONAL FACTORS. IADIS International Conference e-Learning 2013.
8. Lewis KO, Baker RC. The Development of an Electronic Educational Portfolio: An Outline for Medical Education Professionals. *Teaching and Learning in Medicine* 2007;19(2):139-47
9. Buckley S, Coleman J, Davison I, et al. The educational effects of portfolios on undergraduate student learning: A Best Evidence Medical Education (BEME) systematic review. BEME Guide No.11. *Medical Teacher* 2009;31:282-98.
10. Chang C-C. A study on the evaluation and effectiveness analysis of web-based learning portfolio (WBLP). *British Journal of Educational Technology* 2001;32(435-458)
11. Duque G. Web-based evaluation of medical clerkships: a new approach to immediacy and efficacy of feedback and assessment. *Medical Teacher* 2003;25(5):510-14.



12. Duque G, Finkelstein A, Roberts A, et al. Learning while evaluating: the use of an electronic evaluation portfolio in a geriatric medicine clerkship. *BMC Medical Education* 2006;6(4):1-7.
13. Kjaer NK, Maagaard R, Wied S. Using an online portfolio in postgraduate training. *Medical Teacher* 2006;28(8):707-12.
14. Strivens J, Baume D, Owen C, et al. The role of e-portfolios in formative and summative assessment practices: Centre for Recording Achievement, 2008.
15. Dornan T, Carroll C, Parboosingh J. An electronic portfolio for reflective continuing professional development *Medical Education* 2002;36:767-69.
16. Woodward H, Nanlohy P. Digital portfolios: fact or fashion? *Assessment & Evaluation in Higher Education* 2004;29(4):227-38.
17. Hattie J, Timperley H. The Power of Feedback. *Review of Educational Research* 2007;77(81):81.
18. Van de Ridder MJ, Stokking KM, McGaghie WC, et al. What is feedback in clinical education? *Medical Education* 2008;42:189-97.
19. Veloski J, James R, Boex R, James , Grasberg MJ, et al. Systematic review of the literature on assessment, feedback and physicians' clinical performance: BEME Guide No. 7. *Medical Teacher* 2006;28(2):117-28.
20. Bing-You R, Hayes V, Varaklis K, et al. Feedback for Learners in Medical Education: What Is Known? A Scoping Review  
. *Academic Medicine* 2017;92(9):1346-54.
21. Kluger AN, DeNisi A. The Effects of Feedback Interventions on Performance: A Historical Review, a Meta-Analysis, and a Preliminary Feedback Intervention Theory. *Psychological Bulletin* 1996;119(2):254-84.
22. Archer JC. State of the science in health professional education: effective feedback. *Medical Education* 2010;44:101-08.
23. Bing-You R, Hayes V, Varaklis K, et al. Feedback for Learners in Medical Education: What Is Known? A Scoping Review. *Academic Medicine* 2017;92(9):1346-54.
24. Watling CJ, Lingard L. Toward meaningful evaluation of medical trainees: the influence of participants' perceptions of the process. *Advances in Health Science Education* 2012;17:183-94.
25. Munn Z, Stern C, Aromataris E, et al. What kind of systematic review should I conduct? A proposed typology and guidance for systematic reviewers in the medical and health sciences. *BMC Medical Research Methodology* 2018;18(5):1-9.
26. Pawson R, Greenhalgh T, Harvey G, et al. Realist review – a new method of systematic review designed for complex policy interventions. *Journal of*

- 1  
2  
3  
4  
5  
6  
7  
8  
9  
10  
11  
12  
13  
14  
15  
16  
17  
18  
19  
20  
21  
22  
23  
24  
25  
26  
27  
28  
29  
30  
31  
32  
33  
34  
35  
36  
37  
38  
39  
40  
41  
42  
43  
44  
45  
46  
47  
48  
49  
50  
51  
52  
53  
54  
55  
56  
57  
58  
59  
60
- Health Services Research & Policy* 2005;10(Supplement 1 ):21-34.
27. Wong G, Greenhalgh T, Westhorp G, et al. Realist methods in medical education research: what are they and what can they contribute? *Medical Education* 2012;46:89-96.
28. Wong G, Westhorp G, Pawson R, et al. Realist Synthesis: Rameses Training Material. 2013b:1-54.
29. Wong G, Brennan N, Karen M, et al. Interventions to improve antimicrobial prescribing of doctors in training: the IMPACT (IMProving antimicrobial presCribing of doctors in Training) realist review. *BMJ Open* 2015a;5(e009059):1-8.
30. Pearson M, Chilton R, Woods HB, et al. Implementing health promotion in schools: protocol for a realist systematic review of research and experience in the United Kingdom (UK). *Systematic Reviews* 2012;1(48):1-7.
31. Wong G, Greenhalgh T, Westhorp G, et al. RAMESES publication standards: realist syntheses *BMC Medicine* 2013a;11(21):1-14.
32. Liberati A, Altman DG, Tetzlaff J, et al. The PRISMA Statement for Reporting Systematic Reviews and Meta-Analyses of Studies That Evaluate Health Care Interventions: Explanation and Elaboration. *PLoS Medicine* 2009;6(7):1-28.
33. Wong G, Greenhalgh T, Westhorp G, et al. Development of methodological guidance, publication standards and training materials for realist and meta-narrative reviews: the RAMESES (Realist And Meta-narrative Evidence Syntheses – Evolving Standards) project. *Health Services and Delivery Research* 2014;2(30):1-251.
34. Wong G. Data Gathering in Realist Review. In: Emmel N, Greenhalgh J, Manzano A, et al., eds. *Doing Realist Research*. Los Angeles, London, New Delhi, Singapore, Washington DC, Melbourne SAGE 2018.
35. Abdullah F, Ward R. Developing a General Extended Technology Acceptance Model for E-Learning (GETAMEL) by analysing commonly used external factors. *Computers in Human Behavior* 2016;56:238-56.
36. Abdullah F, Ward R, Ahmed E. Investigating the influence of the most commonly used external variables of TAM on students' Perceived Ease of Use (PEOU) and Perceived Usefulness (PU) of e-portfolios. *Computers in Human Behavior* 2016a;63:75-90.
37. Carless D. Trust, distrust and their impact on assessment reform *Assessment & Evaluation in Higher Education* 2009;34(1):79-89.
38. Boehler ML, Rogers DA, Schwind CJ, et al. An investigation of medical student reactions to feedback: a randomised controlled trial. *Medical Education* 2006;40:746-49.

- 1  
2  
3  
4 39. Eva KW, Armson H, Holmboe E, et al. Factors influencing responsiveness to  
5 feedback: on the interplay between fear, confidence, and reasoning  
6 processes. *Advances in Health Sciences Education* 2012;17:15-26.  
7  
8 40. Kluger AN, Van Dijk D. Feedback, the various tasks of the doctor, and the  
9 feedforward alternative. *Medical Education* 2010;44:1166-74.  
10  
11 41. Watling C, Driessen E, van der Vleuten CP, et al. Understanding responses to  
12 feedback: the potential and limitations of regulatory focus theory. *Medical*  
13 *Education* 2012;46:593-603.  
14  
15 42. Telio S, Ajjavi R, Regehr G. The "Educational Alliance" as a Framework for  
16 Reconceptualizing Feedback in Medical Education. *Academic Medicine*  
17 2015;90(5):609-14.  
18  
19 43. Telio S, Regehr G, Ajjawi R. Feedback and educational alliance: examining  
20 credibility judgements and their consequences *Medical Education*  
21 2016;50:933-42.  
22  
23 44. Ohly H, Crossland N, Dykes F, et al. A realist review to explore how low-income  
24 pregnant women use food vouchers from the UK's Healthy Start programme.  
25 *BMJ Open* 2017;7(e013731):1-9.  
26  
27 45. Pearson M, Chilton R, Wyatt K, et al. Implementing health promotion  
28 programmes in schools: a realist systematic review of research and  
29 experience in the United Kingdom. *Implementation Science* 2015;10(149):1-  
30 20.  
31  
32 46. Brennan N, Bryce M, Pearson M, et al. Towards an understanding of how  
33 appraisal of doctors produces its effects: a realist review. *Medical Education*  
34 2017;51:1002-13.  
35  
36 47. Brennan N, Bryce M, Pearson M, et al. Understanding how appraisal of doctors  
37 produces its effects: a realist review protocol. *BMJ Open* 2014;4(e005466  
38 ):1-5.  
39  
40 48. Wong G. Special Invited Editorial: Getting Started With Realist Research.  
41 *International Journal of Qualitative Methods* 2015:1-2.  
42  
43  
44  
45  
46  
47  
48  
49  
50  
51  
52  
53  
54  
55  
56  
57  
58  
59  
60

## Appendix 1 Diagram of the Project

Figure 1. Flow diagram of the Project (Pawson *et al.* 2005; Wong *et al.* 2015a)

Appendix 2 Initial Programme Theory

Figure 2. Initial Programme Theory

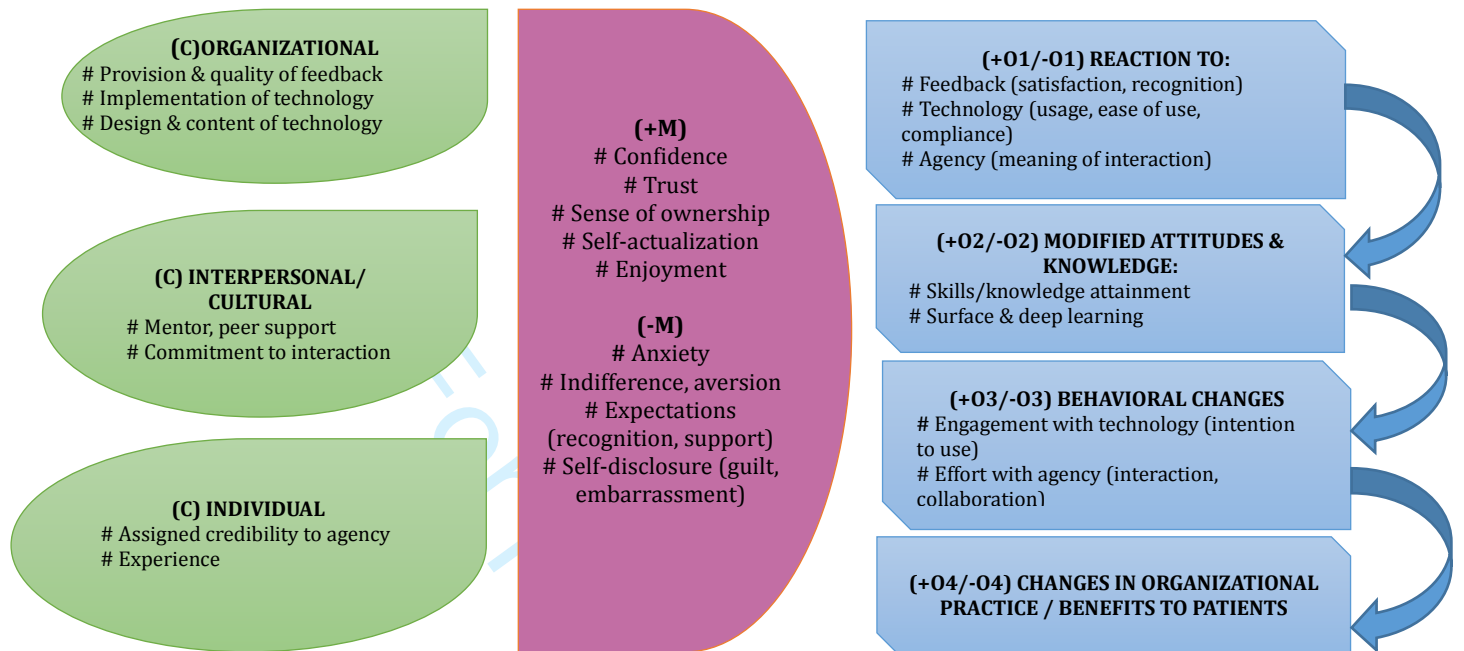

## Appendix 3 Example search strategy for Medline+Journals@Ovid

Table 1. Example search strategy for Medline+Journals@Ovid

|           |                                                                                                       |
|-----------|-------------------------------------------------------------------------------------------------------|
| <b>1</b>  | <b>exp FEEDBACK/</b>                                                                                  |
| <b>2</b>  | ((summative or formative or workplace) adj (feedback or assessment or evaluation)).mp.                |
| <b>3</b>  | ((electronic or online or "web based" or "web-based") adj (feedback or assessment or evaluation)).mp. |
| <b>4</b>  | (portfolio\$ or eportfolio\$ or "e-portfolio\$").mp.                                                  |
| <b>5</b>  | ((paper or "paper based" or "paper-based") adj3 portfolio).mp.                                        |
| <b>6</b>  | ((online or electronic or web or "web based" or "web-based") adj3 portfolio).mp.                      |
| <b>7</b>  | ((online or electronic or web or "web based" or "web-based") adj3 tool).mp.                           |
| <b>8</b>  | OR/1-3                                                                                                |
| <b>9</b>  | OR/4-7                                                                                                |
| <b>10</b> | AND/8,9                                                                                               |
| <b>11</b> | limit 10 to yr="2008 - 2017"                                                                          |
| <b>12</b> | limit 11 to English                                                                                   |

## Appendix 4 Definitions of concepts

Table 2. Definitions of concepts

|                                 | DEFINITION                                                                                                                                               | FORM                                                                                                                  |
|---------------------------------|----------------------------------------------------------------------------------------------------------------------------------------------------------|-----------------------------------------------------------------------------------------------------------------------|
| <b>Feedback</b>                 | Direct or indirect (qualitative, quantitative) interaction between giver and receiver or self.                                                           | Electronic, web-based, online, (e-) feedback, assessment, evaluation.                                                 |
| <b>E-portfolio</b>              | E-portfolio as a tool for managing and documenting one's own learning over a lifespan in ways that encourages deep and continuous learning. <sup>1</sup> | Electronic, digital, web-based, online, e-portfolios                                                                  |
| <b>Feedback via e-portfolio</b> | E-portfolio that fosters a provision of more or less effective feedback                                                                                  | Perceptions of feedback via e-portfolio; Effectiveness of feedback via e-portfolio; Usage of feedback via e-portfolio |

## Appendix 5 Inclusion and exclusion criteria for formal search

Table 3. Inclusion and exclusion criteria for formal search

|                                                 | INCLUSION                                                                                                                | EXCLUSION                                                                                                                                              |
|-------------------------------------------------|--------------------------------------------------------------------------------------------------------------------------|--------------------------------------------------------------------------------------------------------------------------------------------------------|
| <b>Topic</b>                                    | All documents including feedback via e-portfolio as core element.                                                        | Papers focused only on:<br>a. feedback or e-portfolio;<br>b. feedback on implementation or e-portfolio design<br>c. e-portfolio as a tool of research. |
| <b>Study Design</b>                             | All study designs.                                                                                                       | -                                                                                                                                                      |
| <b>Type of Paper</b>                            | Research (peer-reviewed) and non-research pieces (reviews, editorials, communications, conference proceedings, reports). | Documents not applying rigor and relevance criteria <sup>30</sup>                                                                                      |
| <b>Types of Setting</b>                         | Evidence from higher (healthcare) educational setting.                                                                   | Studies done in primary education setting.                                                                                                             |
| <b>Types of participants</b>                    | Receivers AND givers of feedback (i.e., mentor- learner/ learner-learner, learner-self).                                 | -                                                                                                                                                      |
| <b>Language, geographical spread, timeframe</b> | Published worldwide in English. Timespan: 2008-2017                                                                      | -                                                                                                                                                      |

<sup>1</sup> Jenson *et al.* What It Is and Why It Matters. *Change: The Magazine of Higher Learning* 2014;46 (2): 50-57. 2014.

## Appendix 6 Test for assessing relevance and rigour

Table 4. Test for relevance (Pearson *et al.* 2012; 2015; Brennan *et al.* 2017)

| Conceptually Rich                                                                                                                                     | Thicker description' but not 'conceptually rich'                                                                                                    | Conceptually Thin                                                                                                                                                 |
|-------------------------------------------------------------------------------------------------------------------------------------------------------|-----------------------------------------------------------------------------------------------------------------------------------------------------|-------------------------------------------------------------------------------------------------------------------------------------------------------------------|
| Unambiguous theoretical concepts are described in sufficient depth.                                                                                   | Description of programme theory or sufficient information to enable it to 'surface'.                                                                | Insufficient information to enable the programme theory to surface.                                                                                               |
| Relationships between, amongst concepts are clearly articulated.                                                                                      | Consideration of the context in which the programme takes place.                                                                                    | Limited or no consideration of the context in which the programme took place.                                                                                     |
| Concepts are sufficiently developed, defined to enable understanding without the reader needing to have first-hand experience of an area of practice. | Discussion of the differences between the design and orientation of programme theory (what was intended) and implementation (what really happened). | Limited or no discussion of the differences between the design and orientation of programme theory (what was intended) and implementation (what really happened). |
| Concepts are grounded strongly in a cited body of literature.                                                                                         | Recognition and discussion of the strengths/weaknesses of the implemented programme.                                                                | Limited or no discussion of the strengths/ weaknesses of the implemented programme.                                                                               |
| Concepts are parsimonious (i.e., provide the simplest, but not over-simplified, explanation)                                                          | Some attempt to explain anomalous results and findings with reference to context and data.                                                          | No attempts to explain anomalous results and findings with reference to context and data.                                                                         |
|                                                                                                                                                       | Description of the factor affecting implementation.                                                                                                 | Limited or no description of the factors affecting implementation.                                                                                                |
|                                                                                                                                                       | Typified by <b>terms</b> ('model', 'process', or 'function'), <b>verbs</b> ('investigate', 'describes', 'explains'), <b>topics</b> ('experiences'). | Typified by only by mentioning an 'association' between variables.                                                                                                |

Table 5. Test for rigour (Ohly *et al.* 2017)

|                                                                 | Yes | Fairly | No |
|-----------------------------------------------------------------|-----|--------|----|
| The study methods are clearly reported.                         |     |        |    |
| The study methods are appropriate to answer RQ.                 |     |        |    |
| The sample characteristics enable generalizability.             |     |        |    |
| Raw data supports the study findings (conclusions).             |     |        |    |
| Limitations of the study are acknowledged and clearly reported. |     |        |    |





# Reporting checklist for protocol of a systematic review.

Based on the PRISMA-P guidelines.

## Instructions to authors

Complete this checklist by entering the page numbers from your manuscript where readers will find each of the items listed below.

Your article may not currently address all the items on the checklist. Please modify your text to include the missing information. If you are certain that an item does not apply, please write "n/a" and provide a short explanation.

Upload your completed checklist as an extra file when you submit to a journal.

In your methods section, say that you used the PRISMA-P reporting guidelines, and cite them as:

Moher D, Shamseer L, Clarke M, Ghersi D, Liberati A, Petticrew M, Shekelle P, Stewart LA. Preferred Reporting Items for Systematic Review and Meta-Analysis Protocols (PRISMA-P) 2015 statement. *Syst Rev.* 2015;4(1):1.

|                |                     | Reporting Item                                                                                                                                                                                  | Page Number                                           |
|----------------|---------------------|-------------------------------------------------------------------------------------------------------------------------------------------------------------------------------------------------|-------------------------------------------------------|
| Identification | <a href="#">#1a</a> | Identify the report as a protocol of a systematic review                                                                                                                                        | n/a (Realist Synthesis Protocol/RAMESES Standards p5) |
| Update         | <a href="#">#1b</a> | If the protocol is for an update of a previous systematic review, identify as such                                                                                                              | n/a                                                   |
|                | <a href="#">#2</a>  | If registered, provide the name of the registry (such as PROSPERO) and registration number                                                                                                      | n/a (pending for Prospero ID 120863)                  |
| Contact        | <a href="#">#3a</a> | Provide name, institutional affiliation, e-mail address of all protocol authors; provide physical mailing address of corresponding author                                                       | p1                                                    |
| Contribution   | <a href="#">#3b</a> | Describe contributions of protocol authors and identify the guarantor of the review                                                                                                             | p10                                                   |
|                | <a href="#">#4</a>  | If the protocol represents an amendment of a previously completed or published protocol, identify as such and list changes; otherwise, state plan for documenting important protocol amendments | n/a                                                   |
| Sources        | <a href="#">#5a</a> | Indicate sources of financial or other support for the review                                                                                                                                   | p10                                                   |
| Sponsor        | <a href="#">#5b</a> | Provide name for the review funder and / or sponsor                                                                                                                                             | p10                                                   |

|    |                      |                      |                                                                              |                     |
|----|----------------------|----------------------|------------------------------------------------------------------------------|---------------------|
| 1  | Role of sponsor or   | <a href="#">#5c</a>  | Describe roles of funder(s), sponsor(s), and / or institution(s), if any, in | n/a                 |
| 2  | funder               |                      | developing the protocol                                                      |                     |
| 3  |                      |                      |                                                                              |                     |
| 4  | Rationale            | <a href="#">#6</a>   | Describe the rationale for the review in the context of what is already      | p3,4                |
| 5  |                      |                      | known                                                                        |                     |
| 6  |                      |                      |                                                                              |                     |
| 7  |                      |                      |                                                                              |                     |
| 8  | Objectives           | <a href="#">#7</a>   | Provide an explicit statement of the question(s) the review will address     | p4                  |
| 9  |                      |                      | with reference to participants, interventions, comparators, and outcomes     |                     |
| 10 |                      |                      | (PICO)                                                                       |                     |
| 11 |                      |                      |                                                                              |                     |
| 12 |                      |                      |                                                                              |                     |
| 13 |                      |                      |                                                                              |                     |
| 14 | Eligibility criteria | <a href="#">#8</a>   | Specify the study characteristics (such as PICO, study design, setting,      | p7 (Appendix 5)     |
| 15 |                      |                      | time frame) and report characteristics (such as years considered,            |                     |
| 16 |                      |                      | language, publication status) to be used as criteria for eligibility for the |                     |
| 17 |                      |                      | review                                                                       |                     |
| 18 |                      |                      |                                                                              |                     |
| 19 |                      |                      |                                                                              |                     |
| 20 |                      |                      |                                                                              |                     |
| 21 | Information sources  | <a href="#">#9</a>   | Describe all intended information sources (such as electronic databases,     | p7,8                |
| 22 |                      |                      | contact with study authors, trial registers or other grey literature         |                     |
| 23 |                      |                      | sources) with planned dates of coverage                                      |                     |
| 24 |                      |                      |                                                                              |                     |
| 25 |                      |                      |                                                                              |                     |
| 26 | Search strategy      | <a href="#">#10</a>  | Present draft of search strategy to be used for at least one electronic      | p7 (Appendix 3)     |
| 27 |                      |                      | database, including planned limits, such that it could be repeated           |                     |
| 28 |                      |                      |                                                                              |                     |
| 29 |                      |                      |                                                                              |                     |
| 30 | Study records - data | <a href="#">#11a</a> | Describe the mechanism(s) that will be used to manage records and data       | p8,9                |
| 31 | management           |                      | throughout the review                                                        |                     |
| 32 |                      |                      |                                                                              |                     |
| 33 |                      |                      |                                                                              |                     |
| 34 | Study records -      | <a href="#">#11b</a> | State the process that will be used for selecting studies (such as two       | p8                  |
| 35 | selection process    |                      | independent reviewers) through each phase of the review (that is,            |                     |
| 36 |                      |                      | screening, eligibility and inclusion in meta-analysis)                       |                     |
| 37 |                      |                      |                                                                              |                     |
| 38 |                      |                      |                                                                              |                     |
| 39 |                      |                      |                                                                              |                     |
| 40 | Study records - data | <a href="#">#11c</a> | Describe planned method of extracting data from reports (such as             | p8,9                |
| 41 | collection process   |                      | piloting forms, done independently, in duplicate), any processes for         |                     |
| 42 |                      |                      | obtaining and confirming data from investigators                             |                     |
| 43 |                      |                      |                                                                              |                     |
| 44 |                      |                      |                                                                              |                     |
| 45 | Data items           | <a href="#">#12</a>  | List and define all variables for which data will be sought (such as PICO    | p7,8 (Appendix 4,7) |
| 46 |                      |                      | items, funding sources), any pre-planned data assumptions and                |                     |
| 47 |                      |                      | simplifications                                                              |                     |
| 48 |                      |                      |                                                                              |                     |
| 49 |                      |                      |                                                                              |                     |
| 50 |                      |                      |                                                                              |                     |
| 51 | Outcomes and         | <a href="#">#13</a>  | List and define all outcomes for which data will be sought, including        | p4                  |
| 52 | prioritization       |                      | prioritization of main and additional outcomes, with rationale               |                     |
| 53 |                      |                      |                                                                              |                     |
| 54 |                      |                      |                                                                              |                     |
| 55 | Risk of bias in      | <a href="#">#14</a>  | Describe anticipated methods for assessing risk of bias of individual        | p8 (Appendix 6)     |
| 56 | individual studies   |                      | studies, including whether this will be done at the outcome or study         |                     |
| 57 |                      |                      | level, or both; state how this information will be used in data synthesis    |                     |
| 58 |                      |                      |                                                                              |                     |
| 59 |                      |                      |                                                                              |                     |
| 60 |                      |                      |                                                                              |                     |

|    |                |                      |                                                                                                                                                                                                                                                     |     |
|----|----------------|----------------------|-----------------------------------------------------------------------------------------------------------------------------------------------------------------------------------------------------------------------------------------------------|-----|
| 1  | Data synthesis | <a href="#">#15a</a> | Describe criteria under which study data will be quantitatively synthesized                                                                                                                                                                         | n/a |
| 2  |                |                      |                                                                                                                                                                                                                                                     |     |
| 3  |                |                      |                                                                                                                                                                                                                                                     |     |
| 4  |                |                      |                                                                                                                                                                                                                                                     |     |
| 5  |                | <a href="#">#15b</a> | If data are appropriate for quantitative synthesis, describe planned summary measures, methods of handling data and methods of combining data from studies, including any planned exploration of consistency (such as I <sup>2</sup> , Kendall's T) | n/a |
| 6  |                |                      |                                                                                                                                                                                                                                                     |     |
| 7  |                |                      |                                                                                                                                                                                                                                                     |     |
| 8  |                |                      |                                                                                                                                                                                                                                                     |     |
| 9  |                |                      |                                                                                                                                                                                                                                                     |     |
| 10 |                |                      |                                                                                                                                                                                                                                                     |     |
| 11 |                |                      |                                                                                                                                                                                                                                                     |     |
| 12 |                | <a href="#">#15c</a> | Describe any proposed additional analyses (such as sensitivity or subgroup analyses, meta-regression)                                                                                                                                               | n/a |
| 13 |                |                      |                                                                                                                                                                                                                                                     |     |
| 14 |                |                      |                                                                                                                                                                                                                                                     |     |
| 15 |                |                      |                                                                                                                                                                                                                                                     |     |
| 16 |                | <a href="#">#15d</a> | If quantitative synthesis is not appropriate, describe the type of summary planned                                                                                                                                                                  | p9  |
| 17 |                |                      |                                                                                                                                                                                                                                                     |     |
| 18 |                |                      |                                                                                                                                                                                                                                                     |     |
| 19 |                |                      |                                                                                                                                                                                                                                                     |     |
| 20 | Meta-bias(es)  | <a href="#">#16</a>  | Specify any planned assessment of meta-bias(es) (such as publication bias across studies, selective reporting within studies)                                                                                                                       | n/a |
| 21 |                |                      |                                                                                                                                                                                                                                                     |     |
| 22 |                |                      |                                                                                                                                                                                                                                                     |     |
| 23 |                |                      |                                                                                                                                                                                                                                                     |     |
| 24 | Confidence in  | <a href="#">#17</a>  | Describe how the strength of the body of evidence will be assessed (such as GRADE)                                                                                                                                                                  | n/a |
| 25 | cumulative     |                      |                                                                                                                                                                                                                                                     |     |
| 26 | evidence       |                      |                                                                                                                                                                                                                                                     |     |
| 27 |                |                      |                                                                                                                                                                                                                                                     |     |
| 28 |                |                      |                                                                                                                                                                                                                                                     |     |
| 29 |                |                      |                                                                                                                                                                                                                                                     |     |

The PRISMA-P checklist is distributed under the terms of the Creative Commons Attribution License CC-BY 4.0. This checklist can be completed online using <https://www.goodreports.org/>, a tool made by the [EQUATOR Network](#) in collaboration with [Penelope.ai](#)
