# Supplementary material for: Understanding how to enhance efficacy and effectiveness of feedback via e-portfolio: a realist synthesis protocol
Source: PubMed Central journal article supplement — BMJ Open. 2019 May 9;9(5):e029173. doi: 10.1136/bmjopen-2019-029173 (PMC6528049; doi:10.1136/bmjopen-2019-029173), 2019-05-09
Supplement: bmjopen-2019-029173supp001.pdf [file bmjopen-2019-029173supp001.pdf]

## Appendix 1 Diagram of the Project

Figure 1. Flow diagram of the Project (Pawson *et al.* 2005; Wong *et al.* 2015a)

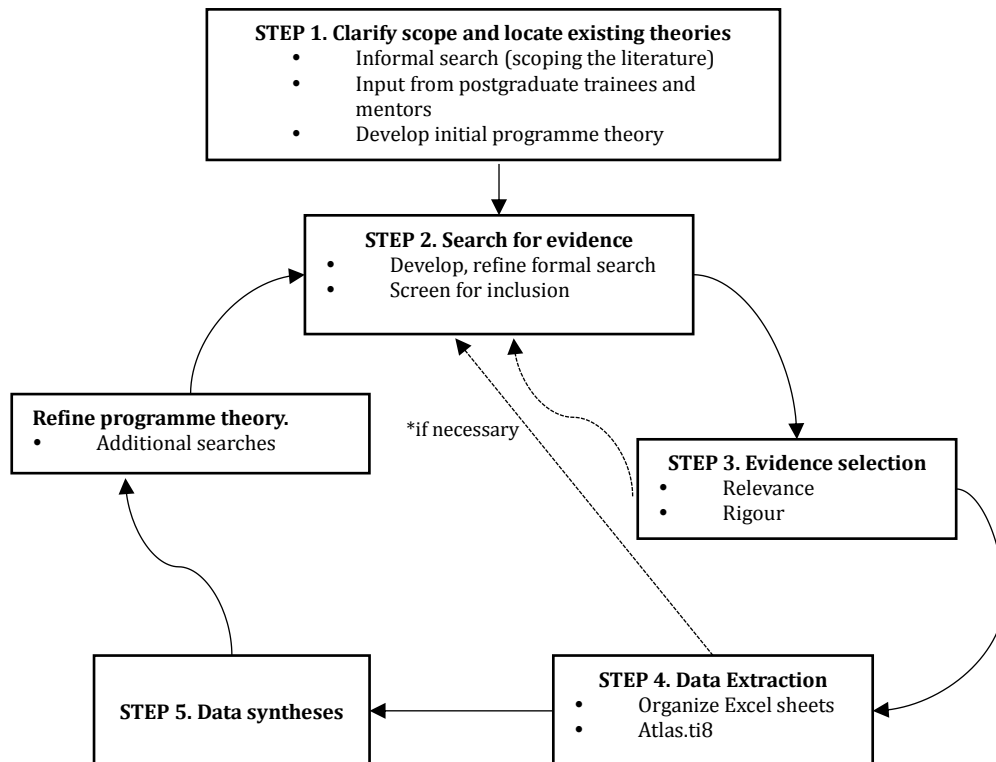

## Appendix 2 Initial Programme Theory

Figure 2. Initial Programme Theory

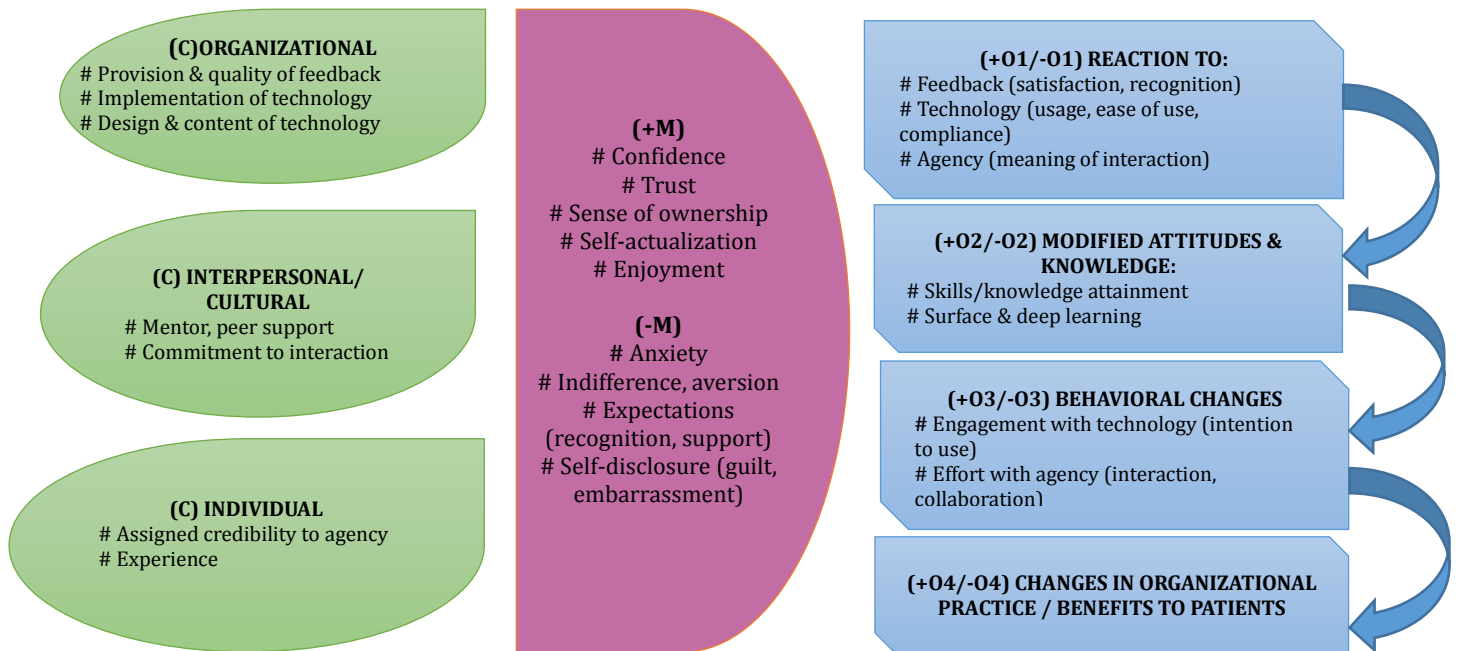

### Appendix 3 Example search strategy for Medline+Journals@Ovid

Table 1. Example search strategy for Medline+Journals@Ovid

|           |                                                                                                       |
|-----------|-------------------------------------------------------------------------------------------------------|
| <b>1</b>  | <b>exp FEEDBACK/</b>                                                                                  |
| <b>2</b>  | ((summative or formative or workplace) adj (feedback or assessment or evaluation)).mp.                |
| <b>3</b>  | ((electronic or online or "web based" or "web-based") adj (feedback or assessment or evaluation)).mp. |
| <b>4</b>  | (portfolio\$ or eportfolio\$ or "e-portfolio\$").mp.                                                  |
| <b>5</b>  | ((paper or "paper based" or "paper-based") adj3 portfolio).mp.                                        |
| <b>6</b>  | ((online or electronic or web or "web based" or "web-based") adj3 portfolio).mp.                      |
| <b>7</b>  | ((online or electronic or web or "web based" or "web-based") adj3 tool).mp.                           |
| <b>8</b>  | OR/1-3                                                                                                |
| <b>9</b>  | OR/4-7                                                                                                |
| <b>10</b> | AND/8,9                                                                                               |
| <b>11</b> | limit 10 to yr="2008 - 2017"                                                                          |
| <b>12</b> | limit 11 to English                                                                                   |
