# Supplementary material for: Understanding how to enhance efficacy and effectiveness of feedback via e-portfolio: a realist synthesis protocol
Source: PubMed Central journal article supplement — BMJ Open. 2019 May 9;9(5):e029173. doi: 10.1136/bmjopen-2019-029173 (PMC6528049; doi:10.1136/bmjopen-2019-029173), 2019-05-09
Supplement: bmjopen-2019-029173supp002.pdf [file bmjopen-2019-029173supp002.pdf]

## Appendix 4 Definitions of concepts

Table 2. Definitions of concepts

|                                 | DEFINITION                                                                                                                                               | FORM                                                                                                                  |
|---------------------------------|----------------------------------------------------------------------------------------------------------------------------------------------------------|-----------------------------------------------------------------------------------------------------------------------|
| <b>Feedback</b>                 | Direct or indirect (qualitative, quantitative) interaction between giver and receiver or self.                                                           | Electronic, web-based, online, (e-) feedback, assessment, evaluation.                                                 |
| <b>E-portfolio</b>              | E-portfolio as a tool for managing and documenting one's own learning over a lifespan in ways that encourages deep and continuous learning. <sup>1</sup> | Electronic, digital, web-based, online, e-portfolios                                                                  |
| <b>Feedback via e-portfolio</b> | E-portfolio that fosters a provision of more or less effective feedback                                                                                  | Perceptions of feedback via e-portfolio; Effectiveness of feedback via e-portfolio; Usage of feedback via e-portfolio |

## Appendix 5 Inclusion and exclusion criteria for formal search

Table 3. Inclusion and exclusion criteria for formal search

|                                                 | INCLUSION                                                                                                                | EXCLUSION                                                                                                                                              |
|-------------------------------------------------|--------------------------------------------------------------------------------------------------------------------------|--------------------------------------------------------------------------------------------------------------------------------------------------------|
| <b>Topic</b>                                    | All documents including feedback via e-portfolio as core element.                                                        | Papers focused only on:<br>a. feedback or e-portfolio;<br>b. feedback on implementation or e-portfolio design<br>c. e-portfolio as a tool of research. |
| <b>Study Design</b>                             | All study designs.                                                                                                       | -                                                                                                                                                      |
| <b>Type of Paper</b>                            | Research (peer-reviewed) and non-research pieces (reviews, editorials, communications, conference proceedings, reports). | Documents not applying rigor and relevance criteria <sup>30</sup>                                                                                      |
| <b>Types of Setting</b>                         | Evidence from higher (healthcare) educational setting.                                                                   | Studies done in primary education setting.                                                                                                             |
| <b>Types of participants</b>                    | Receivers AND givers of feedback (i.e., mentor- learner/ learner-learner, learner-self).                                 | -                                                                                                                                                      |
| <b>Language, geographical spread, timeframe</b> | Published worldwide in English. Timespan: 2008-2017                                                                      | -                                                                                                                                                      |

<sup>1</sup> Jenson *et al.* What It Is and Why It Matters. *Change: The Magazine of Higher Learning* 2014;46 (2): 50-57. 2014.

## Appendix 6 Test for assessing relevance and rigour

Table 4. Test for relevance (Pearson *et al.* 2012; 2015; Brennan *et al.* 2017)

| Conceptually Rich                                                                                                                                     | Thicker description' but not 'conceptually rich'                                                                                                    | Conceptually Thin                                                                                                                                                 |
|-------------------------------------------------------------------------------------------------------------------------------------------------------|-----------------------------------------------------------------------------------------------------------------------------------------------------|-------------------------------------------------------------------------------------------------------------------------------------------------------------------|
| Unambiguous theoretical concepts are described in sufficient depth.                                                                                   | Description of programme theory or sufficient information to enable it to 'surface'.                                                                | Insufficient information to enable the programme theory to surface.                                                                                               |
| Relationships between, amongst concepts are clearly articulated.                                                                                      | Consideration of the context in which the programme takes place.                                                                                    | Limited or no consideration of the context in which the programme took place.                                                                                     |
| Concepts are sufficiently developed, defined to enable understanding without the reader needing to have first-hand experience of an area of practice. | Discussion of the differences between the design and orientation of programme theory (what was intended) and implementation (what really happened). | Limited or no discussion of the differences between the design and orientation of programme theory (what was intended) and implementation (what really happened). |
| Concepts are grounded strongly in a cited body of literature.                                                                                         | Recognition and discussion of the strengths/weaknesses of the implemented programme.                                                                | Limited or no discussion of the strengths/ weaknesses of the implemented programme.                                                                               |
| Concepts are parsimonious (i.e., provide the simplest, but not over-simplified, explanation)                                                          | Some attempt to explain anomalous results and findings with reference to context and data.                                                          | No attempts to explain anomalous results and findings with reference to context and data.                                                                         |
|                                                                                                                                                       | Description of the factor affecting implementation.                                                                                                 | Limited or no description of the factors affecting implementation.                                                                                                |
|                                                                                                                                                       | Typified by <b>terms</b> ('model', 'process', or 'function'), <b>verbs</b> ('investigate', 'describes', 'explains'), <b>topics</b> ('experiences'). | Typified by only by mentioning an 'association' between variables.                                                                                                |

Table 5. Test for rigour (Ohly *et al.* 2017)

|                                                                 | Yes | Fairly | No |
|-----------------------------------------------------------------|-----|--------|----|
| The study methods are clearly reported.                         |     |        |    |
| The study methods are appropriate to answer RQ.                 |     |        |    |
| The sample characteristics enable generalizability.             |     |        |    |
| Raw data supports the study findings (conclusions).             |     |        |    |
| Limitations of the study are acknowledged and clearly reported. |     |        |    |
